# Supplementary material for: Comparison and assessment of family- and population-based genotype imputation methods in large pedigrees
Source: PubMed Central journal article supplement (PMC6314157; doi:10.1101/gr.236315.118), 2019-01
Supplement: supp_gr.236315.118_Supplemental_Fig_S1.pdf [file supp_gr.236315.118_Supplemental_Fig_S1.pdf]

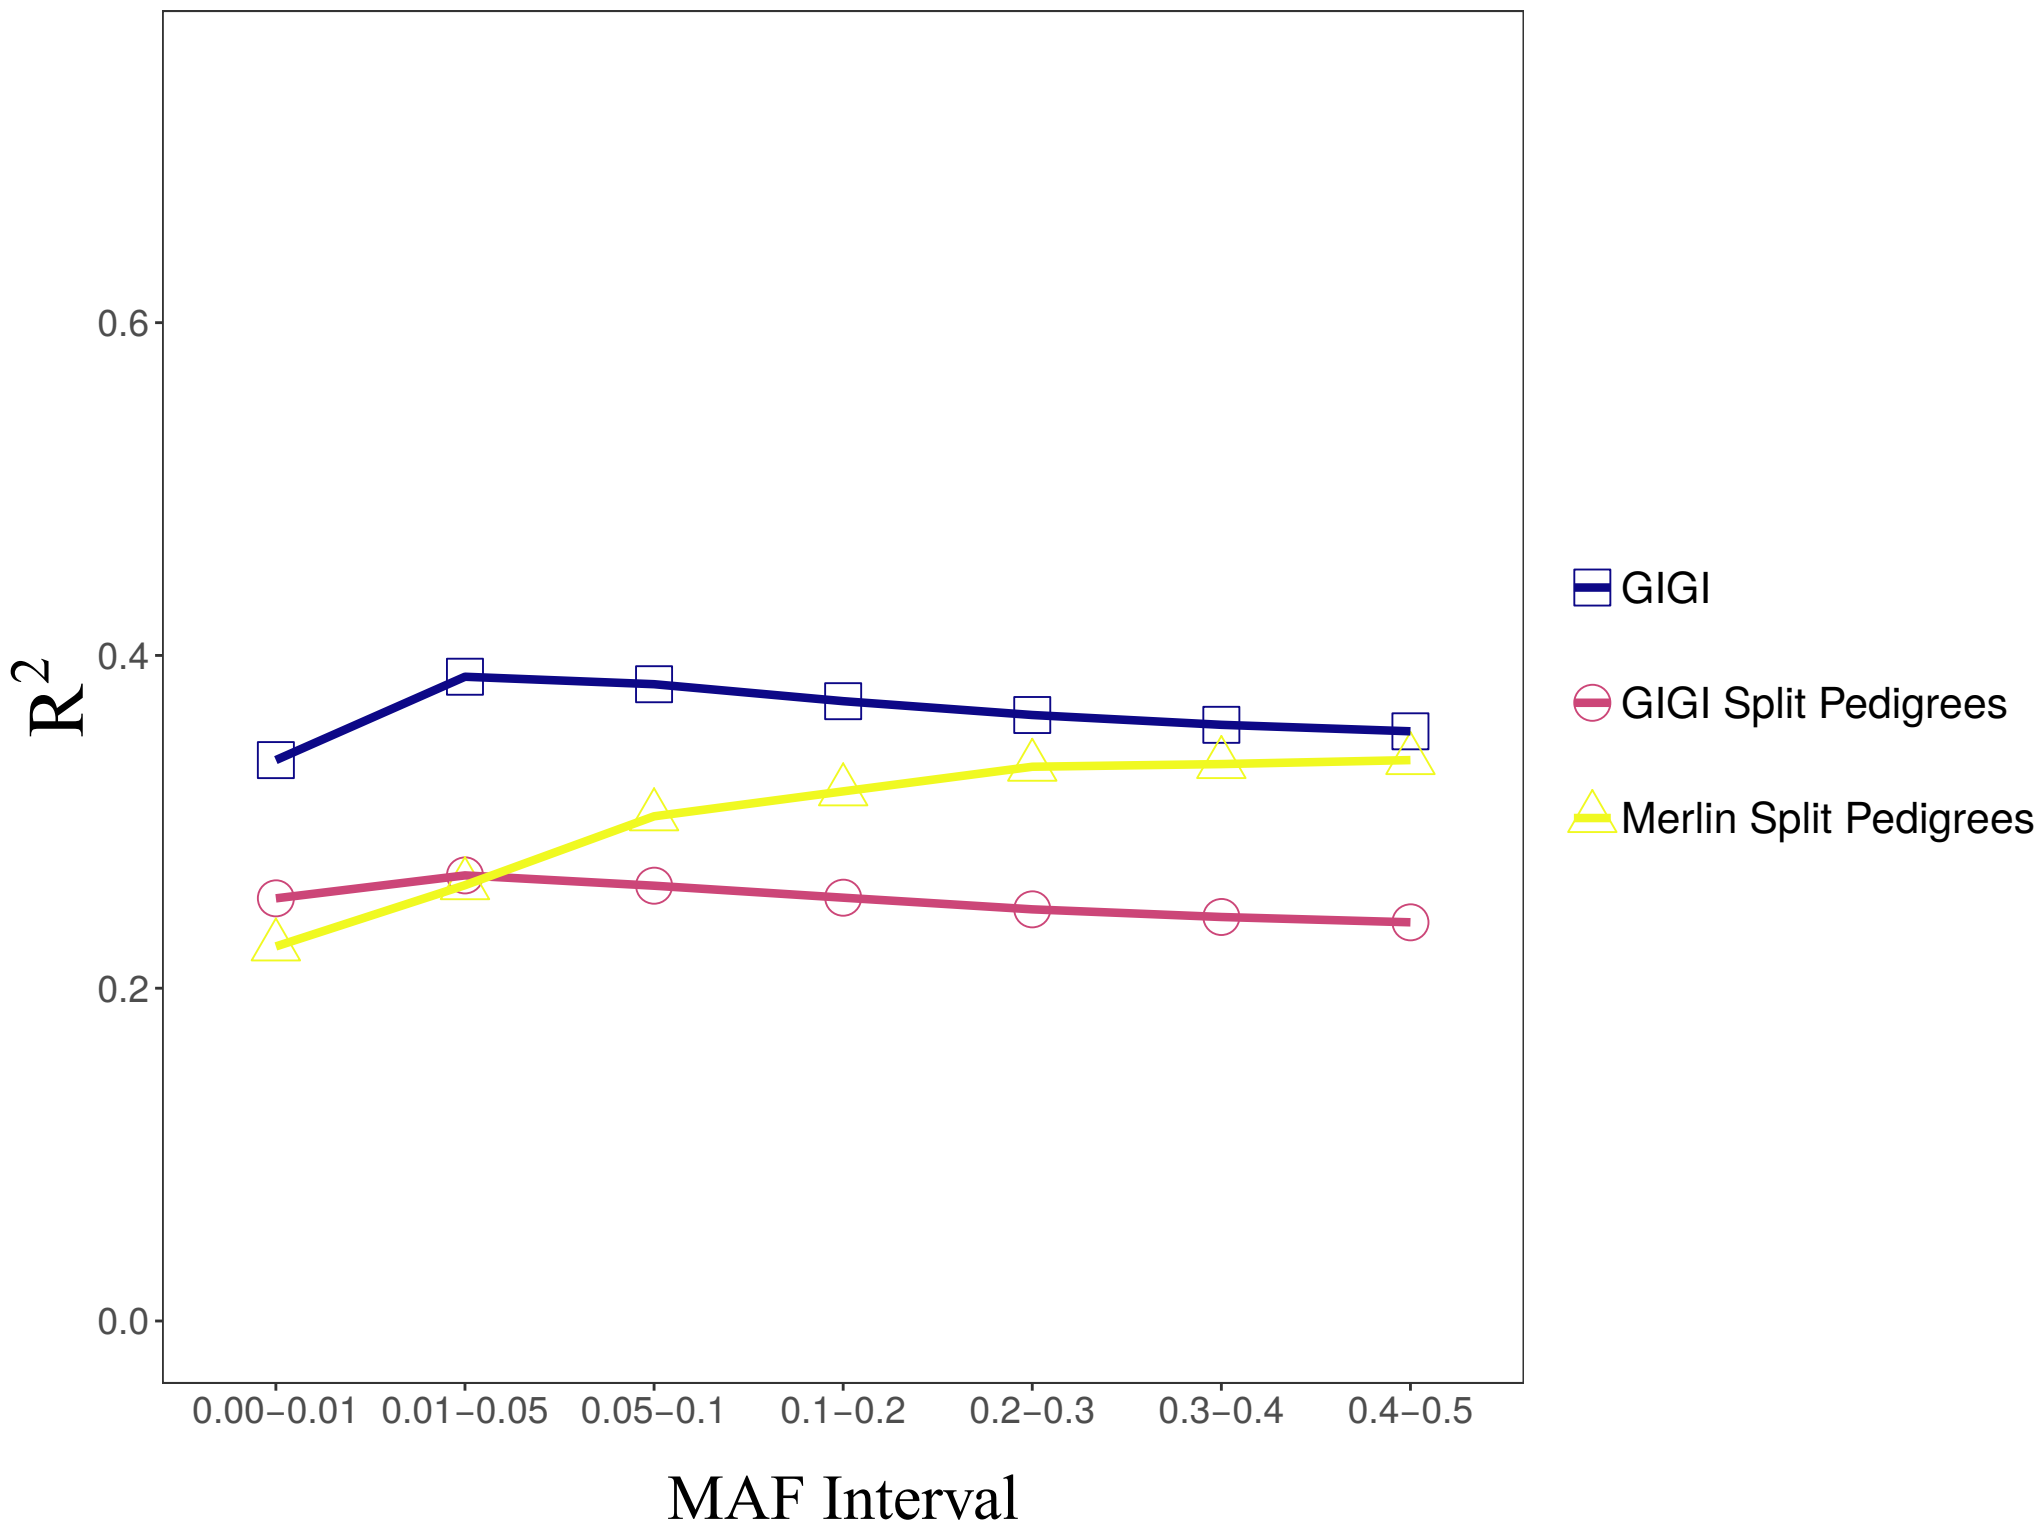

**Supplemental Figure S1:** Mean correlation  $R^2$  between true and imputed genotypes for GIGI and Merlin using sub-pedigrees, and also GIGI using whole pedigrees without splitting in EUR using the random selection strategy.
