# Supplementary material for: Comparison and assessment of family- and population-based genotype imputation methods in large pedigrees
Source: PubMed Central journal article supplement (PMC6314157; doi:10.1101/gr.236315.118), 2019-01
Supplement: supp_gr.236315.118_Supplemental_Fig_S3.pdf [file supp_gr.236315.118_Supplemental_Fig_S3.pdf]

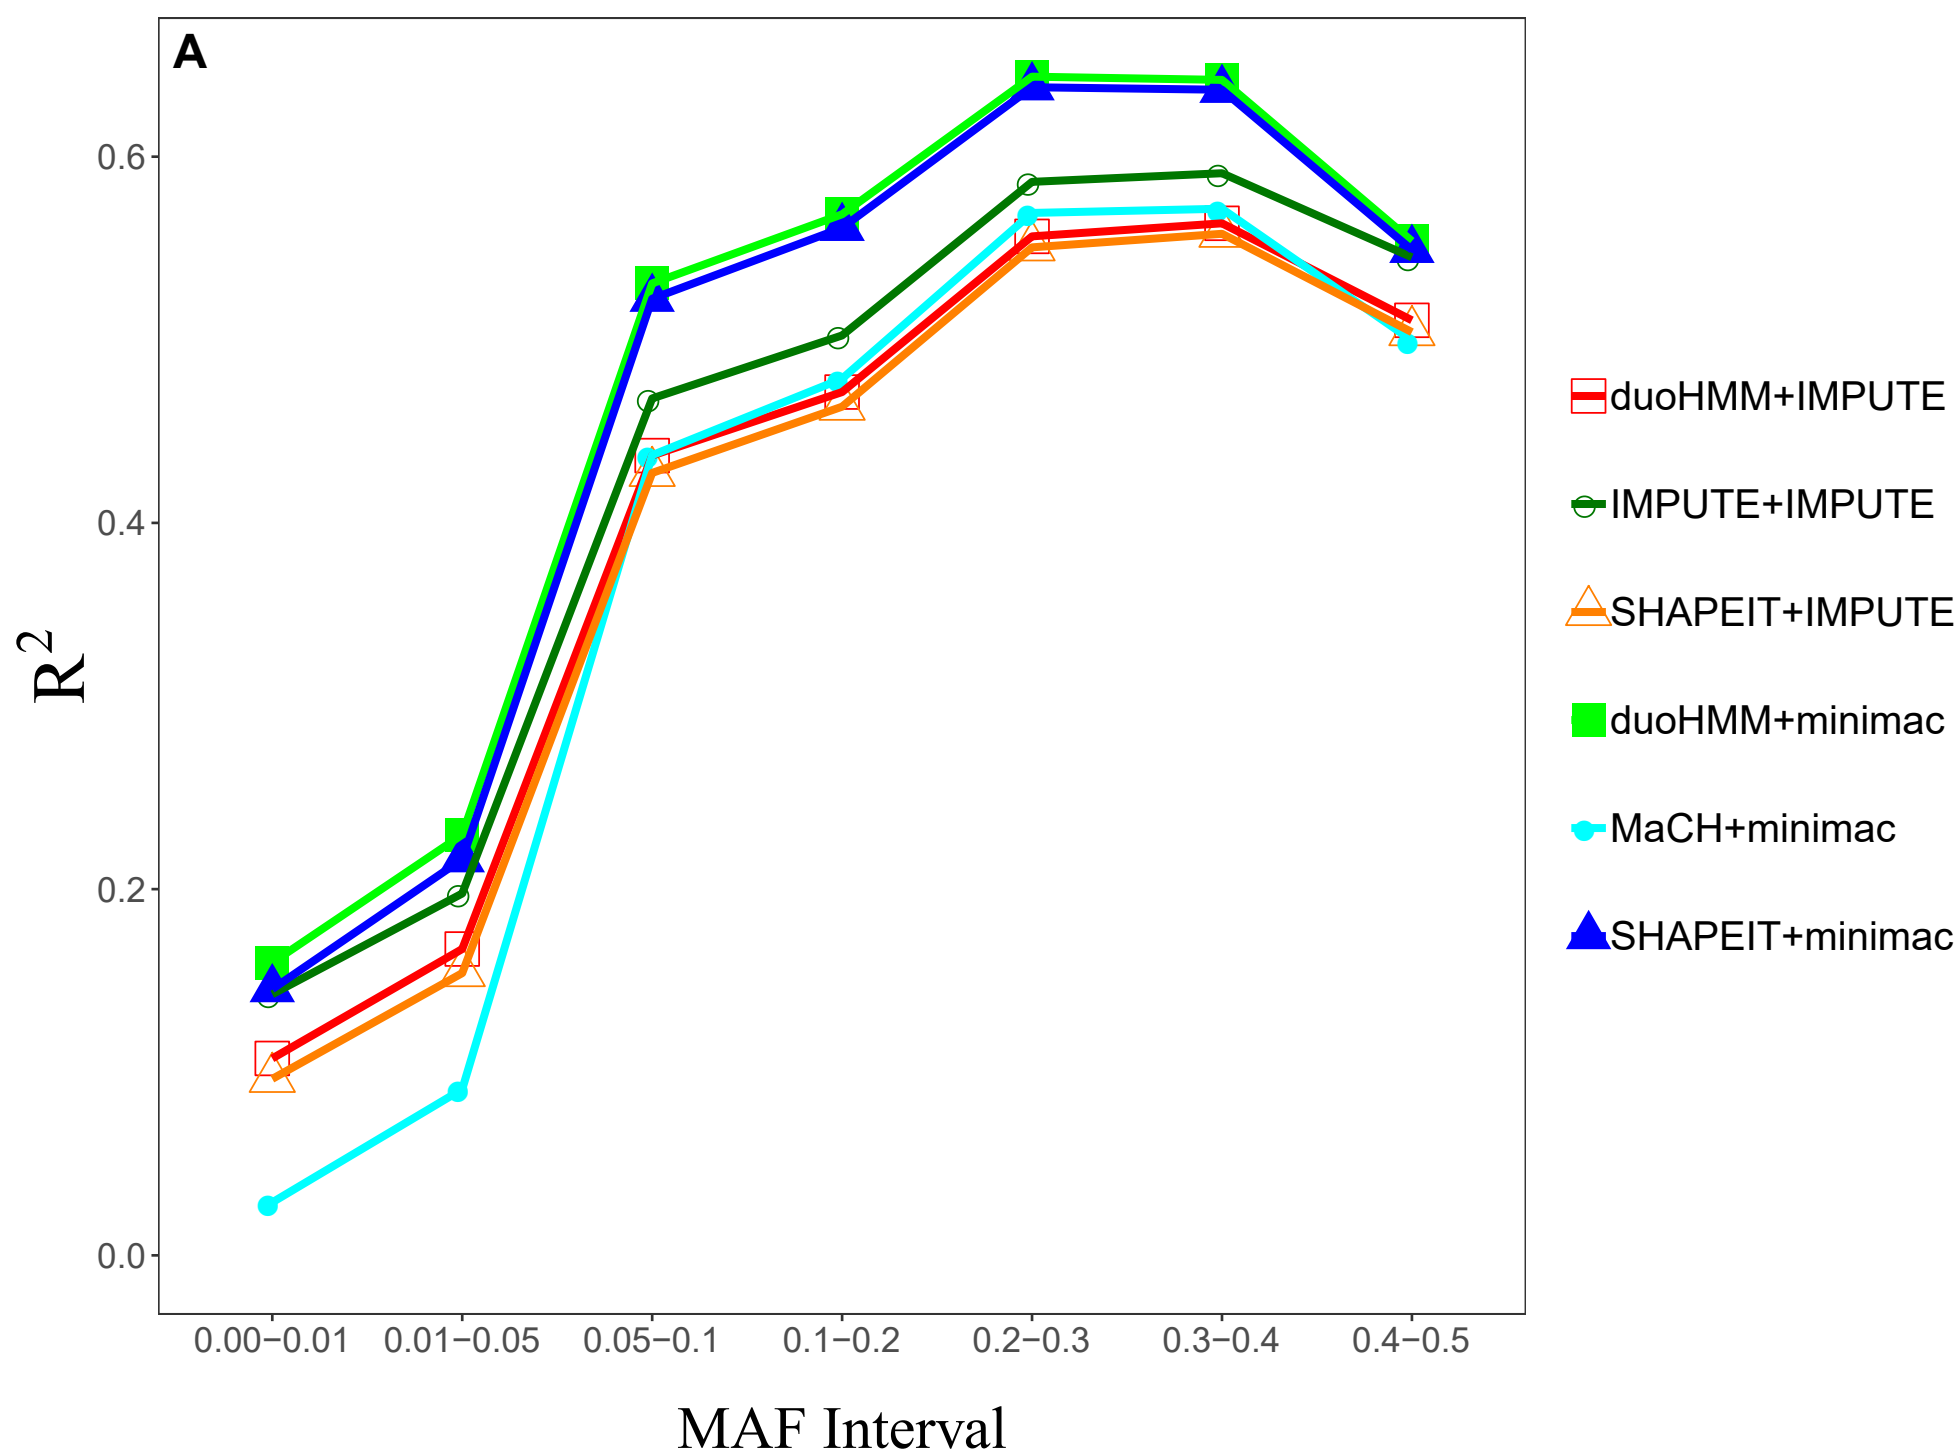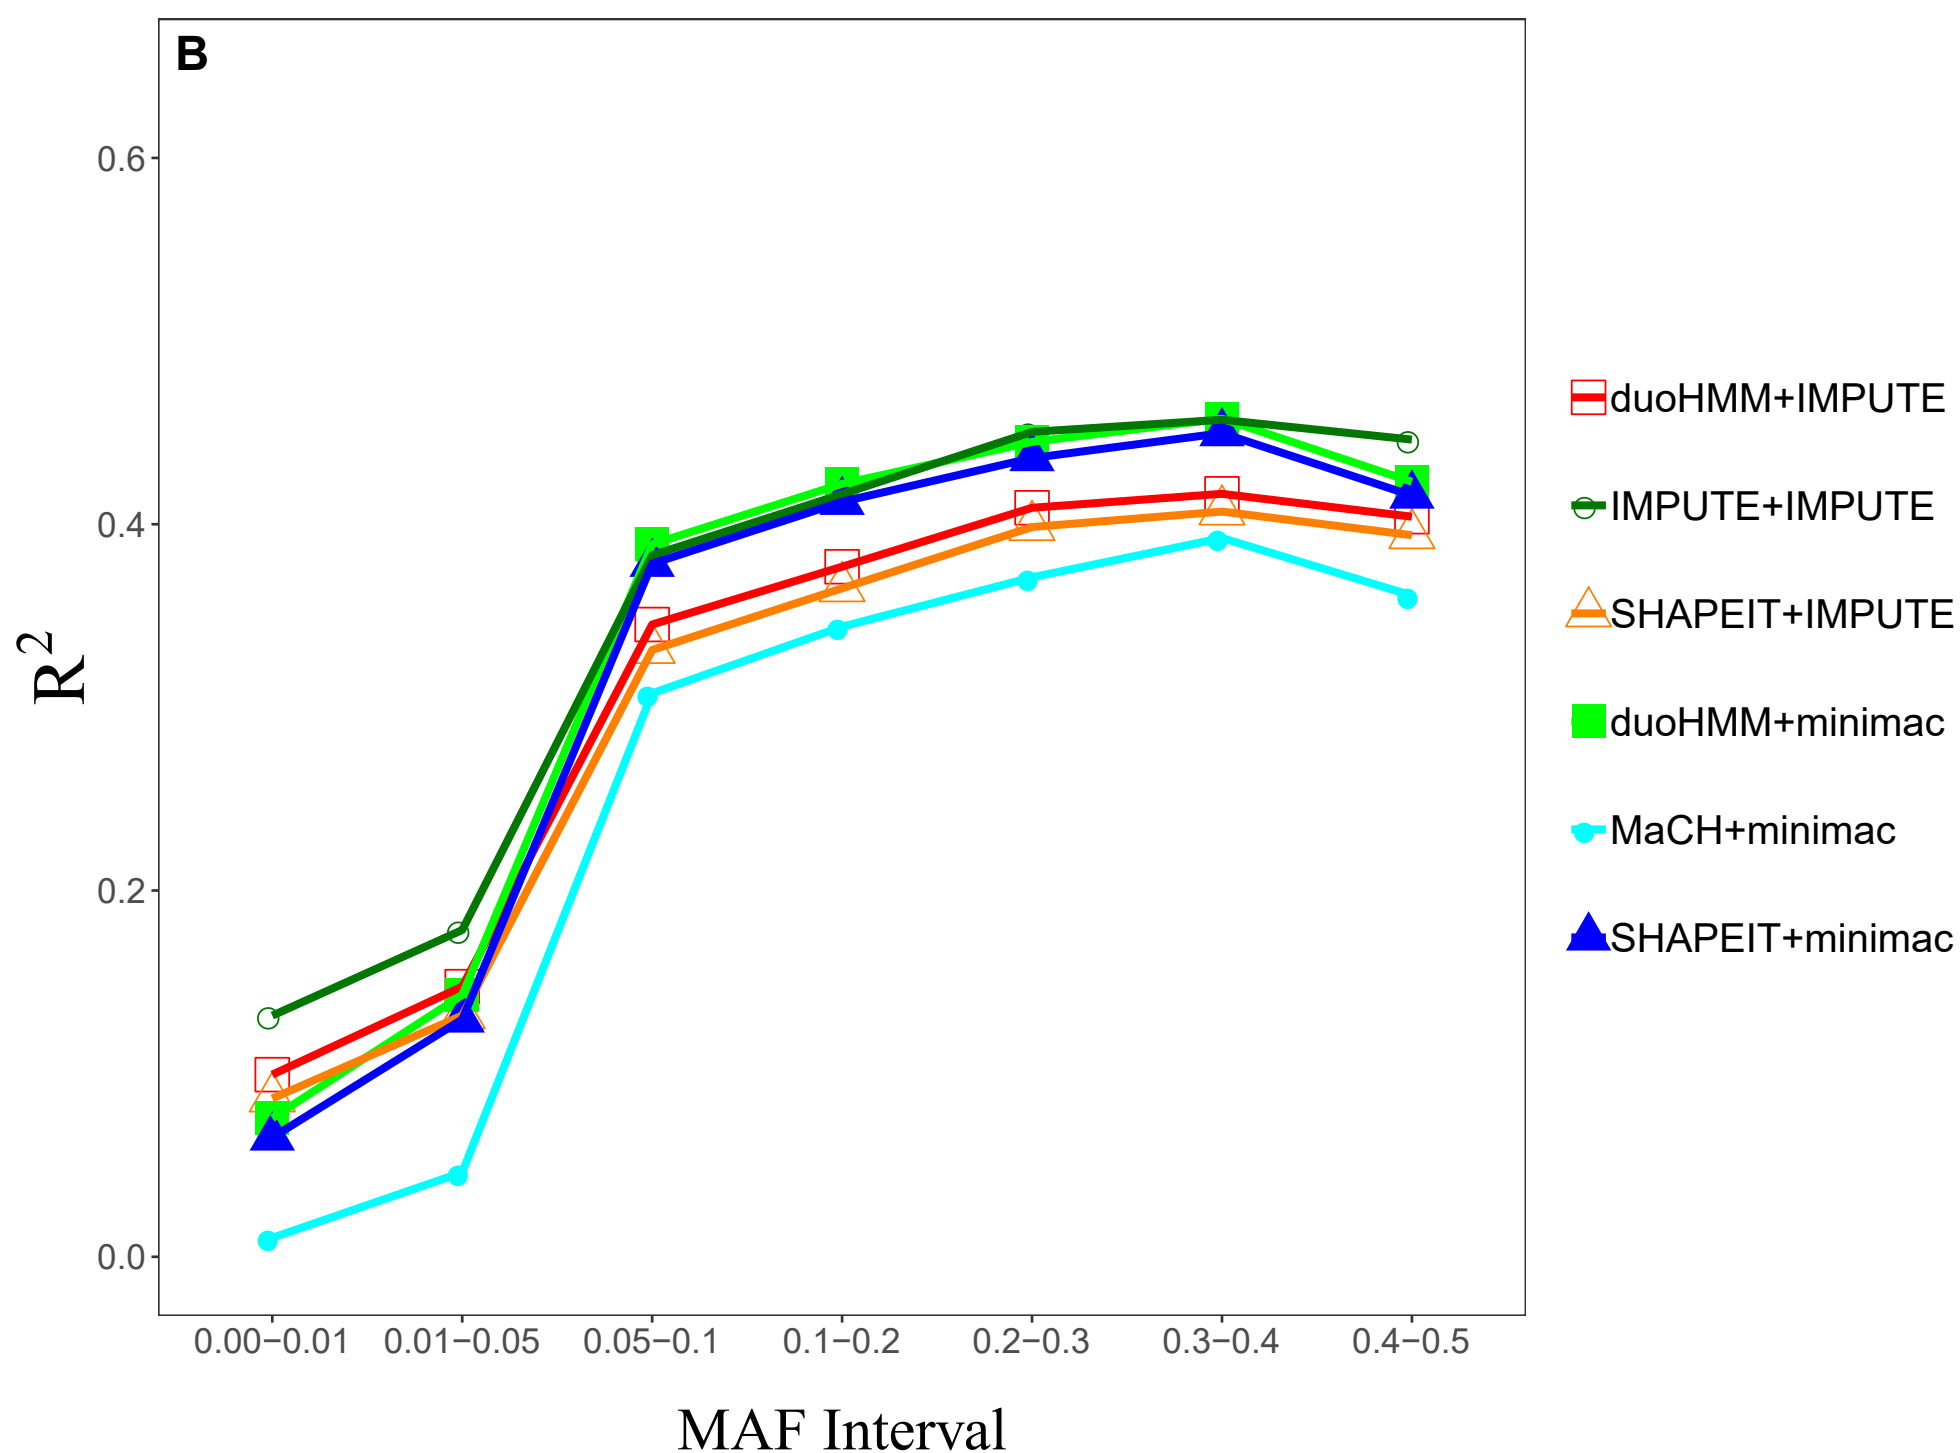

**Supplemental Figure S3:** Mean correlation  $R^2$  and IQS between true and imputed genotypes for duoHMM+IMPUTE, IMPUTE+IMPUTE, SHAPEIT+IMPUTE, duoHMM+minimac, MaCH+minimac, and SHAPEIT+minimac: (A)  $R^2$  for EUR and (B)  $R^2$  for AFR, using the random selection strategy. The first/second of a pair of programs in the key indicates phasing/imputation functions. Computation of the mean of  $R^2$  and IQS is based on a second randomly generated set of all 100 genetic datasets with a sample size of 960 subjects, each having 7,954 SNPs for EUR and 10,891 SNPs for AFR.
