# Supplementary material for: Comparison and assessment of family- and population-based genotype imputation methods in large pedigrees
Source: Genome Res. 2019 Jan;29(1):125–34. doi: 10.1101/gr.236315.118 (PMC6314157; doi:10.1101/gr.236315.118)
Supplement: Supplemental Material [file supp_gr.236315.118_Supplemental_Table_S1.xlsx]

## Sheet: Type 1_0.05
Supplemental Table S1: Type 1 error of association tests performed in European and African data for the different combination of phasing+imputation approaches using the random selection strategy for a=0.05.
	MAF bin
Method	[0,0.01)		[0.01,0.05)		[0.05,0.1)		[0.1,0.2)		[0.2,0.3)		[0.3,0.4)		[0.4,0.5]
	EUR	AFR	EUR	AFR	EUR	AFR	EUR	AFR	EUR	AFR	EUR	AFR	EUR	AFR
Observed genotypes	0.0501648	0.0502342	0.0506026	0.0503431	0.0510182	0.0500544	0.0521033	0.0503785	0.0532292	0.050606	0.0510028	0.0503902	0.0512529	0.0505485
Ped_Pop	0.0533689	0.0509325	0.0504207	0.0503731	0.0510467	0.0510893	0.0518889	0.0506304	0.0524941	0.0507454	0.0508172	0.0506945	0.0502903	0.0508264
GIGI	0.0533454	0.0508999	0.0503272	0.0503404	0.0512666	0.0517453	0.050641	0.0508859	0.0510081	0.0508991	0.049522	0.0521282	0.0493408	0.0509016
Merlin	0.0561347	0.0503614	0.0531816	0.0494731	0.0519223	0.0502788	0.0506289	0.0502174	0.0496292	0.0506977	0.0483158	0.0514337	0.0481075	0.0500052
MaCH+minimac	0.0378195	0.039959	0.0506032	0.0490808	0.0514108	0.0492114	0.052398	0.0501412	0.0533089	0.0505929	0.051609	0.0497232	0.0519602	0.0508807
SHAPEIT+minimac	0.0375652	0.0408987	0.0505927	0.0501256	0.0506804	0.0505037	0.0519329	0.0503829	0.0525097	0.0513198	0.0510565	0.0506292	0.051397	0.0509496
duoHMM+minimac	0.0374999	0.0407075	0.0507026	0.0503606	0.0508267	0.0505966	0.0519769	0.0502087	0.0525881	0.0509873	0.0510151	0.0505587	0.0510085	0.0507428
IMPUTE+IMPUTE	0.0371367	0.0408077	0.0511268	0.0500651	0.0516287	0.0501137	0.052288	0.0502297	0.0533115	0.0509444	0.0515046	0.0504349	0.0517943	0.0506864
SHAPEIT+IMPUTE	0.0378296	0.0411369	0.0505741	0.050568	0.0504278	0.0504554	0.0518042	0.0499677	0.0520449	0.0507633	0.051253	0.0509266	0.0509757	0.0501536
duoHMM+IMPUTE	0.0378655	0.0410105	0.0507008	0.0507059	0.0504468	0.0505129	0.0519681	0.0500628	0.0522603	0.0508348	0.0513512	0.0505312	0.0507836	0.0501619
Beagle+Beagle	0.0365053	0.0399272	0.0506421	0.0499942	0.0512477	0.0503246	0.0521517	0.0506877	0.0527839	0.0505726	0.0516612	0.0505209	0.0516218	0.0509183
