# Supplementary material for: Comparison and assessment of family- and population-based genotype imputation methods in large pedigrees
Source: Genome Res. 2019 Jan;29(1):125–34. doi: 10.1101/gr.236315.118 (PMC6314157; doi:10.1101/gr.236315.118)
Supplement: Supplemental Material [file supp_gr.236315.118_Supplemental_Table_S2.xlsx]

## Sheet: Type 1_0.01
Supplemental Table S2: Type 1 error of association tests performed in European and African data for the different combination of phasing+imputation approaches using the random selection strategy for a=0.01.
	MAF bin
Method	[0,0.01)		[0.01,0.05)		[0.05,0.1)		[0.1,0.2)		[0.2,0.3)		[0.3,0.4)		[0.4,0.5]
	EUR	AFR	EUR	AFR	EUR	AFR	EUR	AFR	EUR	AFR	EUR	AFR	EUR	AFR
Observed genotypes	0.0101322	0.00997545	0.00999814	0.0101993	0.0100603	0.0102223	0.0107144	0.0103094	0.0112063	0.0101686	0.0104044	0.0102991	0.0105191	0.00998099
Ped_Pop	0.0120115	0.0107111	0.00995688	0.0101025	0.00994664	0.0104136	0.0105836	0.0101962	0.011107	0.0104296	0.0102171	0.0106	0.00992753	0.0105138
GIGI	0.011949	0.0107099	0.00987669	0.0101185	0.0105171	0.0106111	0.0105088	0.0103087	0.0104306	0.0104141	0.00978439	0.0107891	0.00944076	0.0101795
Merlin	0.0131482	0.0100076	0.0116799	0.0094512	0.0106528	0.00975218	0.0103043	0.0101185	0.0101499	0.010339	0.00951738	0.0104487	0.00980966	0.0100374
MaCH+minimac	0.00765789	0.00802399	0.0102614	0.00993175	0.0102771	0.0100022	0.0107287	0.00995231	0.0111514	0.010084	0.0104166	0.0101736	0.0105496	0.0103383
SHAPEIT+minimac	0.00755857	0.00827994	0.0101922	0.0101993	0.00994664	0.0102901	0.0106067	0.0102172	0.0112781	0.0103355	0.0103261	0.0103782	0.0104187	0.0101335
duoHMM+minimac	0.00757558	0.00823889	0.0102527	0.0102082	0.009994	0.0102767	0.0106485	0.0100917	0.0111723	0.0103188	0.0103322	0.0103748	0.0104994	0.0100771
IMPUTE+IMPUTE	0.00734567	0.00827994	0.0103456	0.0099389	0.0102403	0.0100896	0.0104451	0.0100888	0.0111279	0.0103486	0.010412	0.0103249	0.0107723	0.0105702
SHAPEIT+IMPUTE	0.00765927	0.00839786	0.0100702	0.01021	0.0100287	0.0101073	0.0105726	0.0100946	0.0108655	0.0101126	0.0102954	0.0101169	0.0104798	0.0102254
duoHMM+IMPUTE	0.00766617	0.00830932	0.0102225	0.0100932	0.0100077	0.0101636	0.0106584	0.010165	0.0106931	0.0101841	0.0102478	0.0101169	0.0103619	0.0100374
Beagle+Beagle	0.00732268	0.00797891	0.0101893	0.0100831	0.0101277	0.010141	0.0107111	0.0101838	0.0109073	0.0101686	0.0102908	0.0102493	0.0106391	0.0103738
