# Supplementary material for: Comparison and assessment of family- and population-based genotype imputation methods in large pedigrees
Source: Genome Res. 2019 Jan;29(1):125–34. doi: 10.1101/gr.236315.118 (PMC6314157; doi:10.1101/gr.236315.118)
Supplement: Supplemental Material [file supp_gr.236315.118_Supplemental_Table_S3.xlsx]

## Sheet: Type 1_0.001
Supplemental Table S3: Type 1 error of association tests performed in European and African data for the different combination of phasing+imputation approaches using the random selection strategy for a=0.001.
	MAF bin
Method	[0,0.01)		[0.01,0.05)		[0.05,0.1)		[0.1,0.2)		[0.2,0.3)		[0.3,0.4)		[0.4,0.5]
	EUR	AFR	EUR	AFR	EUR	AFR	EUR	AFR	EUR	AFR	EUR	AFR	EUR	AFR
Observed genotypes	0.00102173	0.00102302	0.000923397	0.00105732	0.000974562	0.000995819	0.00101812	0.00102484	0.00112037	0.00105106	0.0010435	0.001071	0.00105431	0.000885899
Ped_Pop	0.00153719	0.00120694	0.000944898	0.0010022	0.00100508	0.00105573	0.0010599	0.00107493	0.00114126	0.0010165	0.00106959	0.0011432	0.000995372	0.00104887
GIGI	0.00152569	0.00121217	0.00097686	0.00101114	0.00110507	0.00111197	0.00108079	0.00102484	0.00104986	0.00104987	0.000936085	0.00112085	0.000877499	0.00102589
Merlin	0.00299805	0.000814552	0.00144117	0.000919082	0.000949304	0.000918794	0.00104781	0.000983473	0.00104333	0.00100459	0.000899256	0.00111398	0.000973544	0.000942312
MaCH+minimac	0.000807449	0.000781552	0.00102393	0.000998627	0.00098193	0.000973812	0.00102801	0.000986377	0.0011491	0.00105226	0.00120617	0.00100052	0.00103248	0.00107185
SHAPEIT+minimac	0.000763766	0.000824614	0.000994293	0.00106238	0.000907206	0.00101294	0.0010665	0.00108509	0.00119741	0.00110111	0.00110028	0.00109163	0.000984458	0.000952759
duoHMM+minimac	0.000745833	0.000801272	0.000984996	0.00109009	0.000938779	0.00100254	0.00108409	0.00103791	0.00119349	0.00108801	0.00106959	0.0011071	0.0010303	0.0009841
IMPUTE+IMPUTE	0.00075365	0.00087331	0.00108785	0.0010171	0.000956671	0.000993373	0.00107309	0.000942102	0.00111123	0.00105464	0.00109721	0.0011432	0.00104558	0.00103842
SHAPEIT+IMPUTE	0.000770663	0.00079282	0.00102567	0.00100578	0.000927203	0.00101844	0.00107089	0.00102339	0.00107728	0.0010749	0.00110182	0.0010349	0.000995372	0.000885899
duoHMM+IMPUTE	0.000763766	0.000784369	0.00102277	0.00102455	0.000975615	0.000981759	0.0010522	0.00103428	0.00107467	0.00104749	0.00106652	0.00100739	0.0010041	0.000904703
Beagle+Beagle	0.000731578	0.000829443	0.00103439	0.00102276	0.00106507	0.00106306	0.00102472	0.00099799	0.00109164	0.00107013	0.00114939	0.00108475	0.00118964	0.00109902
