# Supplementary material for: Comparison and assessment of family- and population-based genotype imputation methods in large pedigrees
Source: Genome Res. 2019 Jan;29(1):125–34. doi: 10.1101/gr.236315.118 (PMC6314157; doi:10.1101/gr.236315.118)
Supplement: Supplemental Material [file supp_gr.236315.118_Supplemental_Table_S4.xlsx]

## Sheet: Type 1_0.05
Supplemental Table S4: Type 1 error of association tests performed in European and African data for the different combination of phasing+imputation approaches using the GIGI-Pick selection strategy for a=0.05.
	MAF bin
Method	[0,0.01)		[0.01,0.05)		[0.05,0.1)		[0.1,0.2)		[0.2,0.3)		[0.3,0.4)		[0.4,0.5]
	EUR	AFR	EUR	AFR	EUR	AFR	EUR	AFR	EUR	AFR	EUR	AFR	EUR	AFR
Observed genotypes	0.0514298	0.0507759	0.0506142	0.0508519	0.0522412	0.0503741	0.0509423	0.0510158	0.0506268	0.0512459	0.0507681	0.0512481	0.0510216	0.0508974
Ped_Pop	0.0487233	0.0519643	0.0505201	0.0510327	0.0520412	0.0509445	0.0510621	0.0512335	0.050551	0.0517738	0.0510473	0.0517655	0.0513665	0.050561
GIGI	0.0487624	0.051972	0.0506044	0.0512064	0.050752	0.0513235	0.0515624	0.0512858	0.0518738	0.0514664	0.0518914	0.051628	0.0519296	0.0516517
Merlin	0.050798	0.0497658	0.0493887	0.0504998	0.0495995	0.0500434	0.0491237	0.0502065	0.0498786	0.0504654	0.0505225	0.0507719	0.0496398	0.0509308
MaCH+minimac	0.0382683	0.0399746	0.051082	0.0493796	0.0521591	0.0497873	0.0509873	0.0501368	0.0501998	0.0516117	0.0500529	0.0514991	0.0510063	0.0509747
SHAPEIT+minimac	0.0385539	0.0409494	0.0506654	0.0499388	0.0528358	0.0499273	0.0510819	0.0504721	0.0505223	0.0513436	0.051276	0.0511913	0.0513905	0.0514866
duoHMM+minimac	0.0388256	0.0409767	0.0505311	0.0501283	0.0526422	0.0501534	0.0512743	0.0505904	0.0504583	0.0514139	0.0512714	0.051671	0.0516087	0.0511042
IMPUTE+IMPUTE	0.0386417	0.0408685	0.0507793	0.0495771	0.0527127	0.0505911	0.0512666	0.0507066	0.0504257	0.0513138	0.0509553	0.0516108	0.0511547	0.0507386
SHAPEIT+IMPUTE	0.0383014	0.0408524	0.0508107	0.0503472	0.0525769	0.0504811	0.0511687	0.0512379	0.0507469	0.051427	0.0514356	0.0515489	0.0511875	0.0508681
duoHMM+IMPUTE	0.0383759	0.0410295	0.0504643	0.0505191	0.0522496	0.0507684	0.0509587	0.0511842	0.0505184	0.0516761	0.0512223	0.0514784	0.05148	0.0508243
Beagle+Beagle	0.0374802	0.0403151	0.0510664	0.0504726	0.0523696	0.0502323	0.0512413	0.0505977	0.0500026	0.0514413	0.0507005	0.0508269	0.0512137	0.0506028
