# Supplementary material for: Comparison and assessment of family- and population-based genotype imputation methods in large pedigrees
Source: Genome Res. 2019 Jan;29(1):125–34. doi: 10.1101/gr.236315.118 (PMC6314157; doi:10.1101/gr.236315.118)
Supplement: Supplemental Material [file supp_gr.236315.118_Supplemental_Table_S7.xlsx]

## Sheet: Power0.01
Supplemental Table S7: Power of association tests performed in European and African data for the different combination of phasing+imputation approaches using the random selection strategy for a=0.01.
	MAF bin
Method	[0,0.01)		[0.01,0.05)		[0.05,0.1)		[0.1,0.2)		[0.2,0.3)		[0.3,0.4)		[0.4,0.5]
	EUR	AFR	EUR	AFR	EUR	AFR	EUR	AFR	EUR	AFR	EUR	AFR	EUR	AFR
Observed genotypes	0.402112	0.463282	0.621369	0.627911	0.604438	0.610408	0.598588	0.6069	0.594117	0.606861	0.598033	0.604033	0.602567	0.605228
Ped_Pop	0.155301	0.163217	0.204214	0.204678	0.304255	0.233171	0.314245	0.241376	0.371183	0.256631	0.383655	0.272749	0.328497	0.268018
GIGI	0.157769	0.163634	0.203053	0.202421	0.19075	0.184051	0.181711	0.169599	0.173703	0.159166	0.170651	0.163751	0.169235	0.17026
Merlin	0.102422	0.104909	0.133948	0.134402	0.176366	0.171744	0.183432	0.17633	0.185753	0.176935	0.181369	0.185637	0.176869	0.16465
MaCH+minimac	0.0136981	0.0100567	0.0473582	0.02883	0.252925	0.176939	0.265586	0.194874	0.322413	0.214432	0.327203	0.223306	0.283744	0.204607
SHAPEIT+minimac	0.0504982	0.0264222	0.106564	0.0627466	0.301275	0.211498	0.312951	0.228508	0.362478	0.24798	0.36441	0.252508	0.310633	0.230764
duoHMM+minimac	0.0558809	0.0303988	0.11405	0.0694531	0.30596	0.217852	0.316962	0.233866	0.366214	0.252983	0.367394	0.256823	0.313224	0.235058
IMPUTE+IMPUTE	0.0426647	0.0440031	0.0930359	0.082247	0.291382	0.230412	0.304547	0.246842	0.357973	0.268892	0.360617	0.273053	0.324472	0.254449
SHAPEIT+IMPUTE	0.0323393	0.033579	0.0738078	0.0643798	0.264585	0.204004	0.274377	0.218525	0.328367	0.241269	0.330995	0.24602	0.292949	0.224901
duoHMM+IMPUTE	0.036349	0.0389235	0.0805105	0.0728297	0.269811	0.211345	0.278501	0.225146	0.33191	0.24728	0.3338	0.251606	0.296462	0.230762
Beagle+Beagle	0.0156487	0.0132208	0.0459723	0.0316465	0.239562	0.172451	0.251788	0.191639	0.31009	0.215171	0.312066	0.223206	0.262281	0.200729
Numbers in bold are the greatest in each column ignoring the first row (i.e. Observed genotypes); Underlined numbers are the greatest within each group of approaches
