# Supplementary material for: Comparison and assessment of family- and population-based genotype imputation methods in large pedigrees
Source: Genome Res. 2019 Jan;29(1):125–34. doi: 10.1101/gr.236315.118 (PMC6314157; doi:10.1101/gr.236315.118)
Supplement: Supplemental Material [file supp_gr.236315.118_Supplemental_Table_S8.xlsx]

## Sheet: Power0.001
Table S8: Power of association tests performed in European and African data for the different combination of phasing+imputation approaches using the random selection strategy for a=0.001.
	MAF bin
Method	[0,0.01)		[0.01,0.05)		[0.05,0.1)		[0.1,0.2)		[0.2,0.3)		[0.3,0.4)		[0.4,0.5]
	EUR	AFR	EUR	AFR	EUR	AFR	EUR	AFR	EUR	AFR	EUR	AFR	EUR	AFR
Observed genotypes	0.243703	0.288575	0.371249	0.378014	0.337017	0.339133	0.324402	0.331399	0.319737	0.32969	0.322578	0.325826	0.323738	0.325724
Ped_Pop	0.058157	0.0600382	0.0679996	0.0678986	0.130231	0.0879291	0.130017	0.0936825	0.164148	0.104801	0.172441	0.111123	0.138424	0.105378
GIGI	0.0588872	0.0601811	0.066323	0.0663559	0.0574224	0.0553031	0.0530445	0.0489799	0.0495025	0.0451493	0.046904	0.0466821	0.0466406	0.0477779
Merlin	0.036069	0.0338856	0.0401396	0.0384072	0.0648042	0.0590363	0.0676676	0.0607953	0.0688765	0.0618006	0.0666002	0.0681743	0.0635729	0.0546416
MaCH+minimac	0.00231475	0.00121941	0.0144698	0.0079333	0.119388	0.078784	0.116226	0.0845881	0.14448	0.0951081	0.146438	0.0962867	0.119161	0.0836506
SHAPEIT+minimac	0.0158602	0.00640293	0.0322916	0.017007	0.137736	0.0903304	0.135252	0.0963993	0.162871	0.107189	0.164077	0.107593	0.130317	0.0933808
duoHMM+minimac	0.0180876	0.00773261	0.0346695	0.0190231	0.139513	0.0927132	0.136833	0.0983706	0.164433	0.109068	0.165455	0.109362	0.131127	0.0946491
IMPUTE+IMPUTE	0.010787	0.0106306	0.0268994	0.0216179	0.133238	0.0968579	0.131364	0.102249	0.159385	0.114125	0.16128	0.115034	0.137311	0.101889
SHAPEIT+IMPUTE	0.00864007	0.00846346	0.0216007	0.0171042	0.121768	0.0856416	0.117541	0.0909825	0.145695	0.103024	0.146304	0.103923	0.12209	0.0900483
duoHMM+IMPUTE	0.0100922	0.0104262	0.0235388	0.0195346	0.123364	0.0885142	0.119496	0.0934946	0.146947	0.105442	0.147641	0.105878	0.123924	0.0921335
Beagle+Beagle	0.00311346	0.0021221	0.0140788	0.00848773	0.112929	0.07578	0.10971	0.0828564	0.138897	0.0949139	0.139282	0.0960581	0.110262	0.0823907
Numbers in bold are the greatest in each column ignoring the first row (i.e. Observed genotypes); Underlined numbers are the greatest within each group of approaches
