# Supplementary material for: Comparison and assessment of family- and population-based genotype imputation methods in large pedigrees
Source: Genome Res. 2019 Jan;29(1):125–34. doi: 10.1101/gr.236315.118 (PMC6314157; doi:10.1101/gr.236315.118)
Supplement: Supplemental Material [file supp_gr.236315.118_Supplemental_Table_S9.xlsx]

## Sheet: Power0.05
Supplemental Table S9: Power of association tests performed in European and African data for the different combination of phasing+imputation approaches using the GIGI-Pick selection strategy for a=0.05.
	MAF bin
Method	[0,0.01)		[0.01,0.05)		[0.05,0.1)		[0.1,0.2)		[0.2,0.3)		[0.3,0.4)		[0.4,0.5]
	EUR	AFR	EUR	AFR	EUR	AFR	EUR	AFR	EUR	AFR	EUR	AFR	EUR	AFR
Observed genotypes	0.578175	0.649033	0.811339	0.811895	0.811184	0.814347	0.811224	0.814063	0.812892	0.814092	0.813311	0.813712	0.812979	0.815052
Ped_Pop	0.357148	0.391421	0.479436	0.471979	0.565414	0.497123	0.576615	0.506497	0.63092	0.53103	0.641094	0.543497	0.572795	0.518924
GIGI	0.36305	0.392445	0.481846	0.469738	0.470414	0.449211	0.458193	0.426839	0.447543	0.416477	0.4438	0.42426	0.435406	0.437814
Merlin	0.312165	0.343893	0.40054	0.411142	0.424312	0.435285	0.420741	0.42801	0.416851	0.418684	0.411466	0.415781	0.397632	0.395922
MaCH+minimac	0.0560791	0.0465196	0.13055	0.0884619	0.419768	0.307081	0.452367	0.337756	0.533539	0.365869	0.535694	0.383516	0.480867	0.362487
SHAPEIT+minimac	0.148426	0.0992583	0.28836	0.190999	0.523669	0.395286	0.549023	0.42116	0.60682	0.443246	0.60552	0.450698	0.540134	0.427404
duoHMM+minimac	0.16396	0.11535	0.309408	0.214768	0.534641	0.412904	0.559065	0.437602	0.614745	0.458563	0.612929	0.464207	0.547215	0.441549
IMPUTE+IMPUTE	0.142959	0.1539	0.272182	0.249668	0.514773	0.443983	0.542209	0.469624	0.605334	0.495877	0.60554	0.501258	0.566875	0.482587
SHAPEIT+IMPUTE	0.108852	0.114373	0.224963	0.198122	0.478263	0.391584	0.507978	0.416763	0.576131	0.444614	0.57649	0.452395	0.533404	0.431974
duoHMM+IMPUTE	0.120157	0.130857	0.245394	0.223638	0.491163	0.410661	0.518189	0.433667	0.583564	0.459986	0.583144	0.467163	0.540398	0.446932
Beagle+Beagle	0.0570116	0.0552576	0.125439	0.0971844	0.39921	0.304296	0.431331	0.335924	0.513845	0.37007	0.512623	0.381453	0.438296	0.350782
Numbers in bold are the greatest in each column ignoring the first row (i.e. Observed genotypes); Underlined numbers are the greatest within each group of approaches
