# Supplementary material for: Comparison and assessment of family- and population-based genotype imputation methods in large pedigrees
Source: Genome Res. 2019 Jan;29(1):125–34. doi: 10.1101/gr.236315.118 (PMC6314157; doi:10.1101/gr.236315.118)
Supplement: Supplemental Material [file supp_gr.236315.118_Supplemental_Table_S10.xlsx]

## Sheet: Power0.01
Table S10: Power of association tests performed in European and African data for the different combination of phasing+imputation approaches using the GIGI-Pick selection strategy for a=0.01.
	MAF bin
Method	[0,0.01)		[0.01,0.05)		[0.05,0.1)		[0.1,0.2)		[0.2,0.3)		[0.3,0.4)		[0.4,0.5]
	EUR	AFR	EUR	AFR	EUR	AFR	EUR	AFR	EUR	AFR	EUR	AFR	EUR	AFR
Observed genotypes	0.433097	0.499965	0.622479	0.623015	0.610921	0.613492	0.607549	0.610747	0.608101	0.611072	0.609226	0.610514	0.60745	0.610708
Ped_Pop	0.197495	0.213343	0.25885	0.254471	0.345686	0.283826	0.352914	0.293749	0.406018	0.316639	0.415209	0.326412	0.354606	0.30556
GIGI	0.200914	0.213973	0.258857	0.251954	0.245233	0.235319	0.235907	0.217997	0.228328	0.207247	0.224868	0.211252	0.218685	0.219168
Merlin	0.16013	0.178437	0.20099	0.206231	0.225831	0.229776	0.226389	0.22524	0.225225	0.218857	0.219639	0.220316	0.209142	0.200387
MaCH+minimac	0.0152151	0.010526	0.0517224	0.0304134	0.261495	0.181933	0.275091	0.196886	0.334896	0.218609	0.33681	0.227279	0.286955	0.206072
SHAPEIT+minimac	0.067468	0.0371712	0.134342	0.077855	0.325572	0.229511	0.339248	0.243978	0.390105	0.262333	0.388432	0.267095	0.328962	0.245333
duoHMM+minimac	0.076807	0.0458178	0.146166	0.0901987	0.332677	0.240012	0.346443	0.253733	0.395844	0.271823	0.393679	0.27575	0.334281	0.253835
IMPUTE+IMPUTE	0.0577653	0.0606842	0.120558	0.104807	0.317558	0.256964	0.333179	0.272335	0.387398	0.294454	0.387211	0.297777	0.347979	0.278837
SHAPEIT+IMPUTE	0.0433457	0.0443042	0.0971845	0.0806987	0.293678	0.223515	0.30797	0.23769	0.364926	0.26007	0.364189	0.264587	0.323265	0.245854
duoHMM+IMPUTE	0.0491776	0.0529866	0.107527	0.0936239	0.301564	0.235463	0.315675	0.247669	0.370517	0.26943	0.369737	0.273595	0.329099	0.255446
Beagle+Beagle	0.0165476	0.0143505	0.0492858	0.033633	0.248158	0.177161	0.260688	0.194503	0.322153	0.219165	0.321241	0.224389	0.259976	0.196644
Numbers in bold are the greatest in each column ignoring the first row (i.e. Observed genotypes); Underlined numbers are the greatest within each group of approaches
