# Supplementary material for: Comparison and assessment of family- and population-based genotype imputation methods in large pedigrees
Source: Genome Res. 2019 Jan;29(1):125–34. doi: 10.1101/gr.236315.118 (PMC6314157; doi:10.1101/gr.236315.118)
Supplement: Supplemental Material [file supp_gr.236315.118_Supplemental_Table_S11.xlsx]

## Sheet: Power0.001
Table S11: Power of association tests performed in European and African data for the different combination of phasing+imputation approaches using the GIGI-Pick selection strategy for a=0.001.
	MAF bin
Method	[0,0.01)		[0.01,0.05)		[0.05,0.1)		[0.1,0.2)		[0.2,0.3)		[0.3,0.4)		[0.4,0.5]
	EUR	AFR	EUR	AFR	EUR	AFR	EUR	AFR	EUR	AFR	EUR	AFR	EUR	AFR
Observed genotypes	0.26542	0.319195	0.364327	0.366428	0.338937	0.341529	0.332446	0.335353	0.32975	0.33426	0.33137	0.332396	0.329708	0.33174
Ped_Pop	0.0745488	0.0801481	0.0904115	0.0891593	0.148497	0.111313	0.149975	0.118142	0.182906	0.132548	0.189356	0.136789	0.153257	0.123888
GIGI	0.0756827	0.0804169	0.0893812	0.0874186	0.0809981	0.0778725	0.0766338	0.0697765	0.0731255	0.0641923	0.0716044	0.0659326	0.0690234	0.068279
Merlin	0.0555604	0.0611425	0.0647598	0.066162	0.0824768	0.0820539	0.0843786	0.0798399	0.0845616	0.077252	0.0818169	0.08071	0.0773487	0.0688577
MaCH+minimac	0.00266559	0.00129346	0.0165241	0.00881395	0.122008	0.0819279	0.120985	0.0862749	0.150031	0.096997	0.151222	0.0983961	0.123376	0.0864065
SHAPEIT+minimac	0.021866	0.00970702	0.041726	0.0216793	0.147274	0.0987328	0.148492	0.10296	0.176167	0.113172	0.176865	0.113548	0.141456	0.10074
duoHMM+minimac	0.0252135	0.012801	0.045981	0.0253717	0.150344	0.102752	0.1521	0.106603	0.178632	0.116701	0.179372	0.117138	0.143796	0.103934
IMPUTE+IMPUTE	0.0150877	0.0151618	0.0356528	0.0284609	0.143405	0.108415	0.145037	0.112812	0.173942	0.12542	0.174999	0.125101	0.150181	0.113186
SHAPEIT+IMPUTE	0.0119457	0.0118955	0.0288915	0.0217472	0.132379	0.0948571	0.1332	0.0987799	0.162545	0.110524	0.163161	0.111042	0.13895	0.0993606
duoHMM+IMPUTE	0.0138048	0.0148354	0.0321422	0.0258699	0.135517	0.099643	0.136271	0.102367	0.165322	0.114108	0.165818	0.114542	0.141002	0.103458
Beagle+Beagle	0.00331946	0.00243319	0.015646	0.0092936	0.115988	0.079226	0.114393	0.0844756	0.144445	0.096469	0.144044	0.0967371	0.112119	0.0821546
Numbers in bold are the greatest in each column ignoring the first row (i.e. Observed genotypes); Underlined numbers are the greatest within each group of approaches
