# Supplementary material for: Comparison and assessment of family- and population-based genotype imputation methods in large pedigrees
Source: HighWire-hosted journal article supplement (doi:10.1101/gr.236315.118), 2018-12-04
Supplement: Supplemental_Fig_S2.pdf [file Supplemental_Fig_S2.pdf]

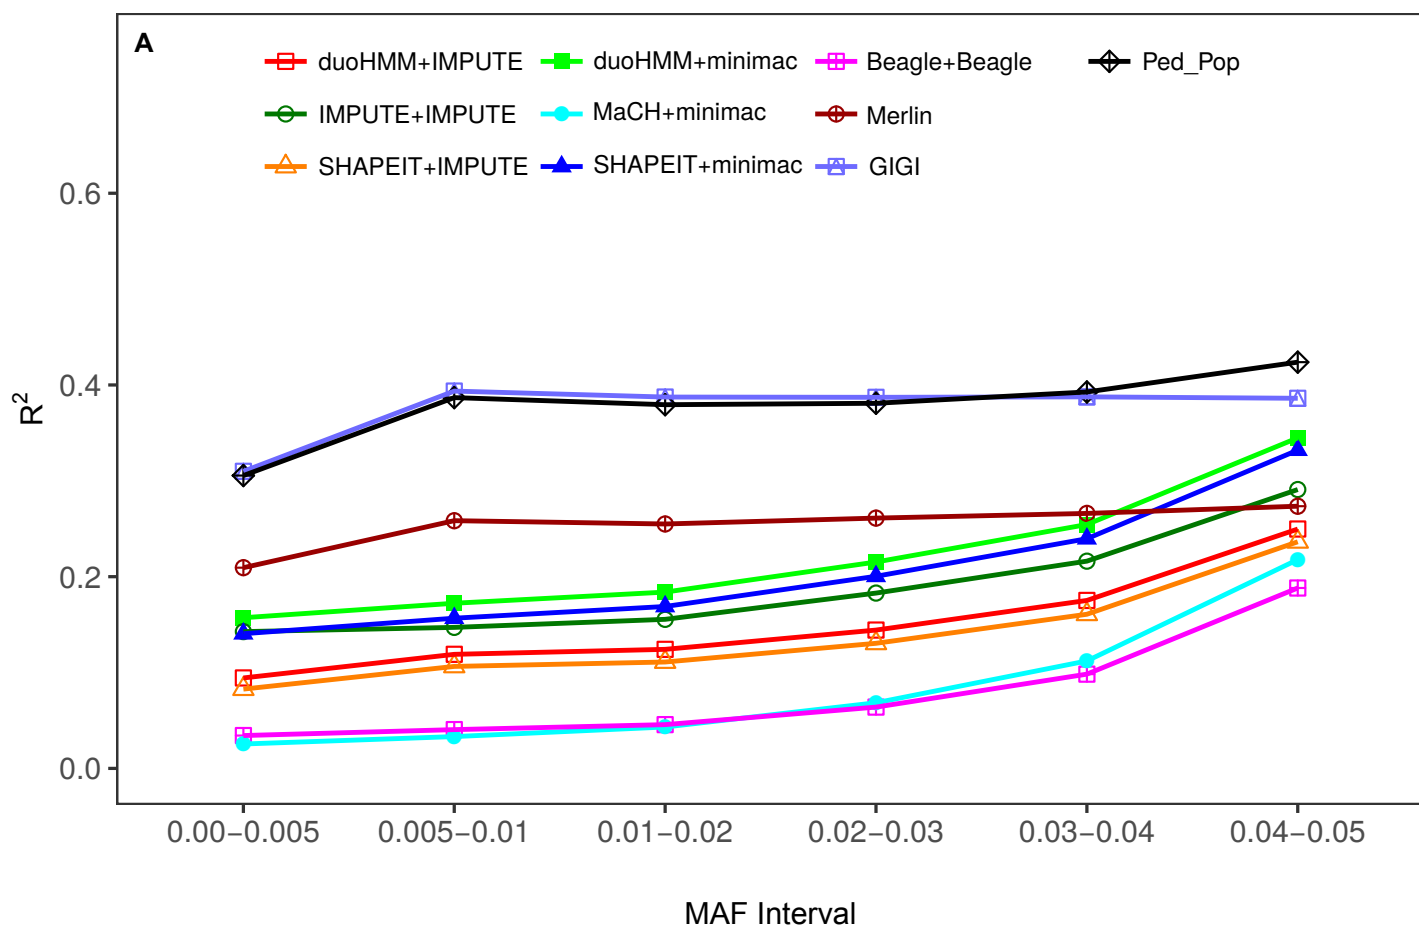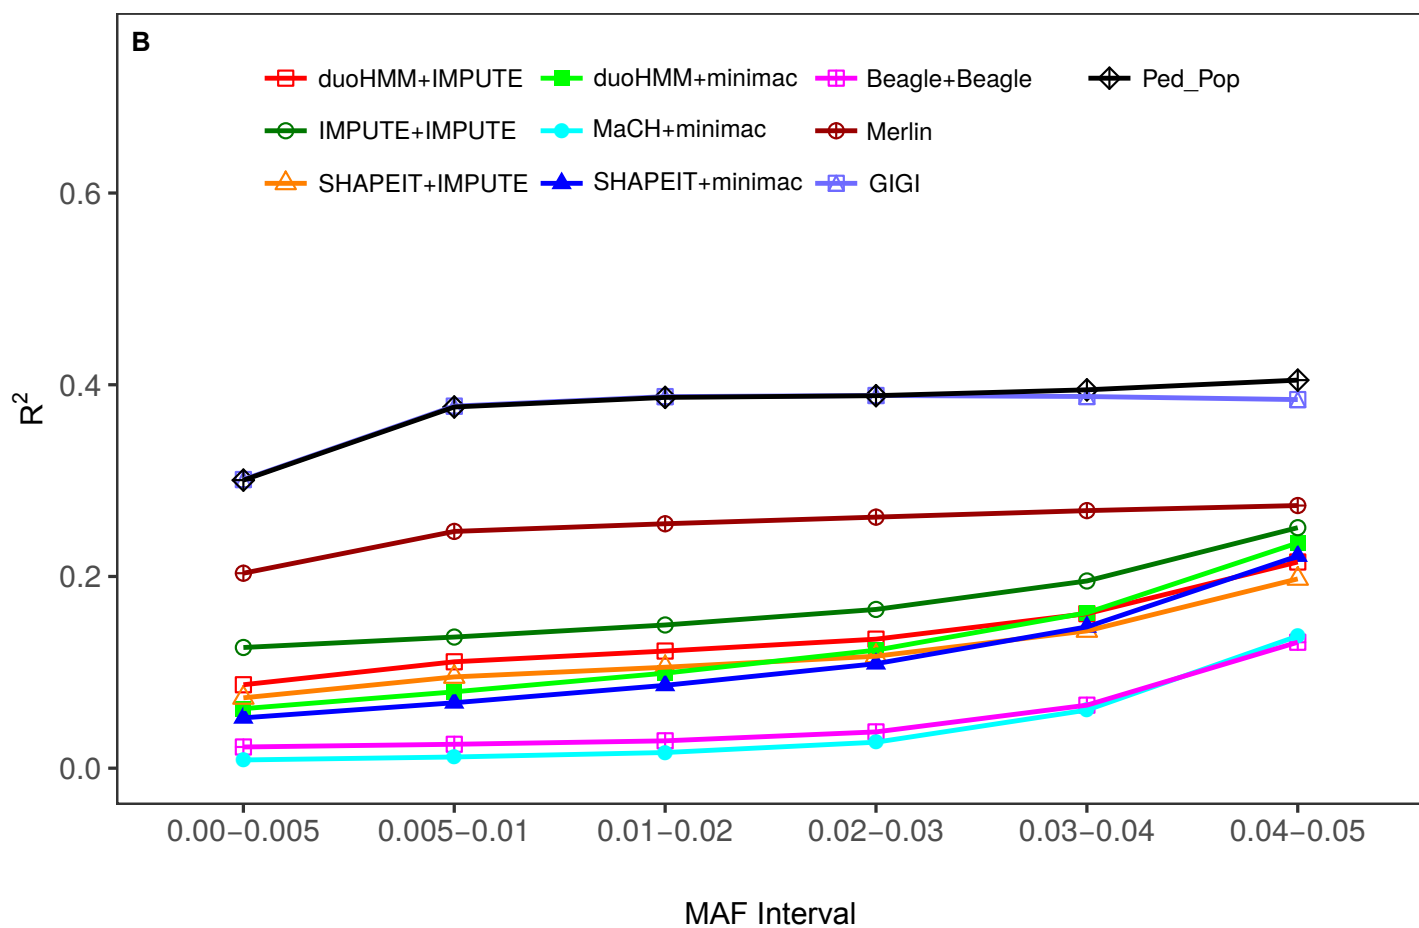

**Supplemental Figure S2:** Mean correlation  $R^2$  between true and imputed genotypes for all approaches with a zoom in the MAF interval  $[0, 0.05)$  for (A) EUR and (B) AFR using the random selection strategy. The first/second of a pair of programs in the key indicates phasing/imputation functions.
