# Supplementary material for: Comparison and assessment of family- and population-based genotype imputation methods in large pedigrees
Source: HighWire-hosted journal article supplement (doi:10.1101/gr.236315.118), 2018-12-04
Supplement: Supplemental_Fig_S4.pdf [file Supplemental_Fig_S4.pdf]

True Genotypes  
GIGI  
duoHMM+minimac  
Ped Pop

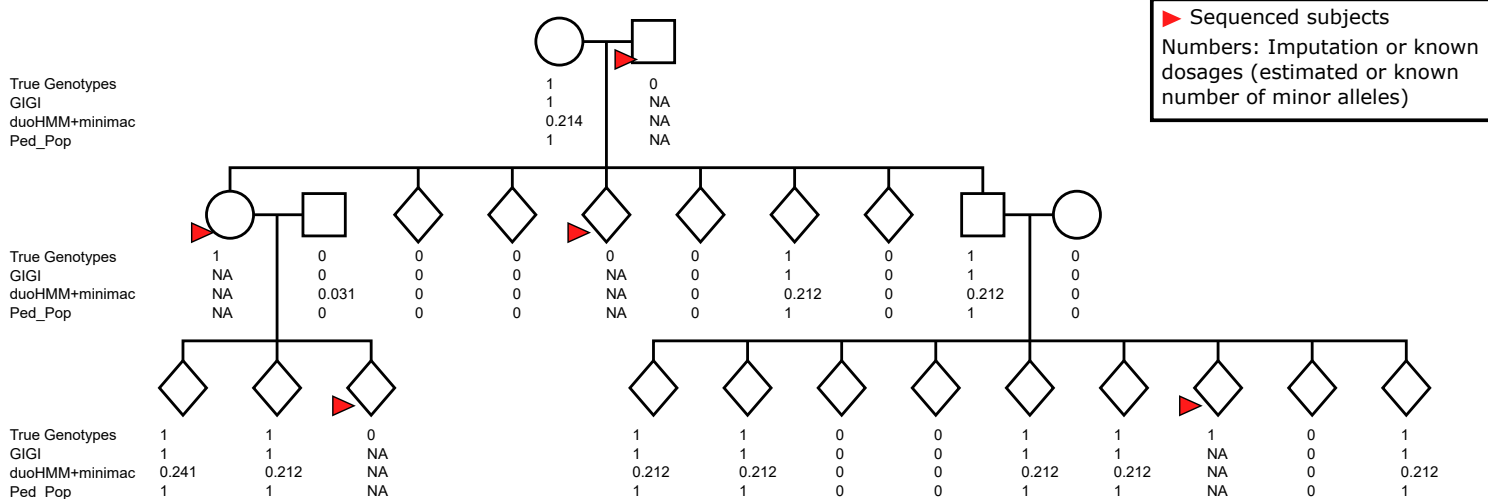

True Genotypes  
GIGI  
duoHMM+minimac  
Ped Pop

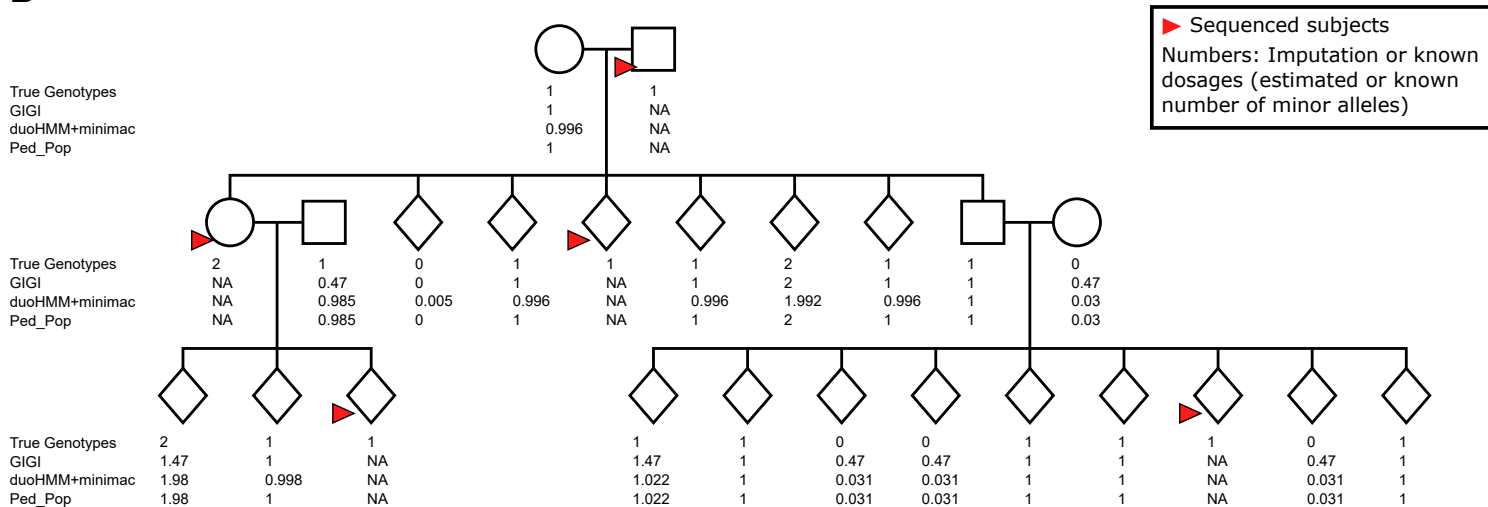

**Supplemental Figure S4:** GIGI, duoHMM+minimac, and Ped\_Pop performance for imputing two SNPs: A) MAF=0.006 B) MAF=0.46. The pedigree size is 24 subjects. Five subjects represented by red triangles were fully observed (no missing genotypes). The numbers are the known or estimated numbers of minor alleles, i.e. dosages. The known genotypes/dosages are in the first row. GIGI's dosages are in the second row. duoHMM+minimac's dosages are in the third row. Ped\_Pop's dosages are in the fourth row.
