# Supplementary material for: Comparison and assessment of family- and population-based genotype imputation methods in large pedigrees
Source: HighWire-hosted journal article supplement (doi:10.1101/gr.236315.118), 2018-12-04
Supplement: Supplemental_Fig_S5.pdf [file Supplemental_Fig_S5.pdf]

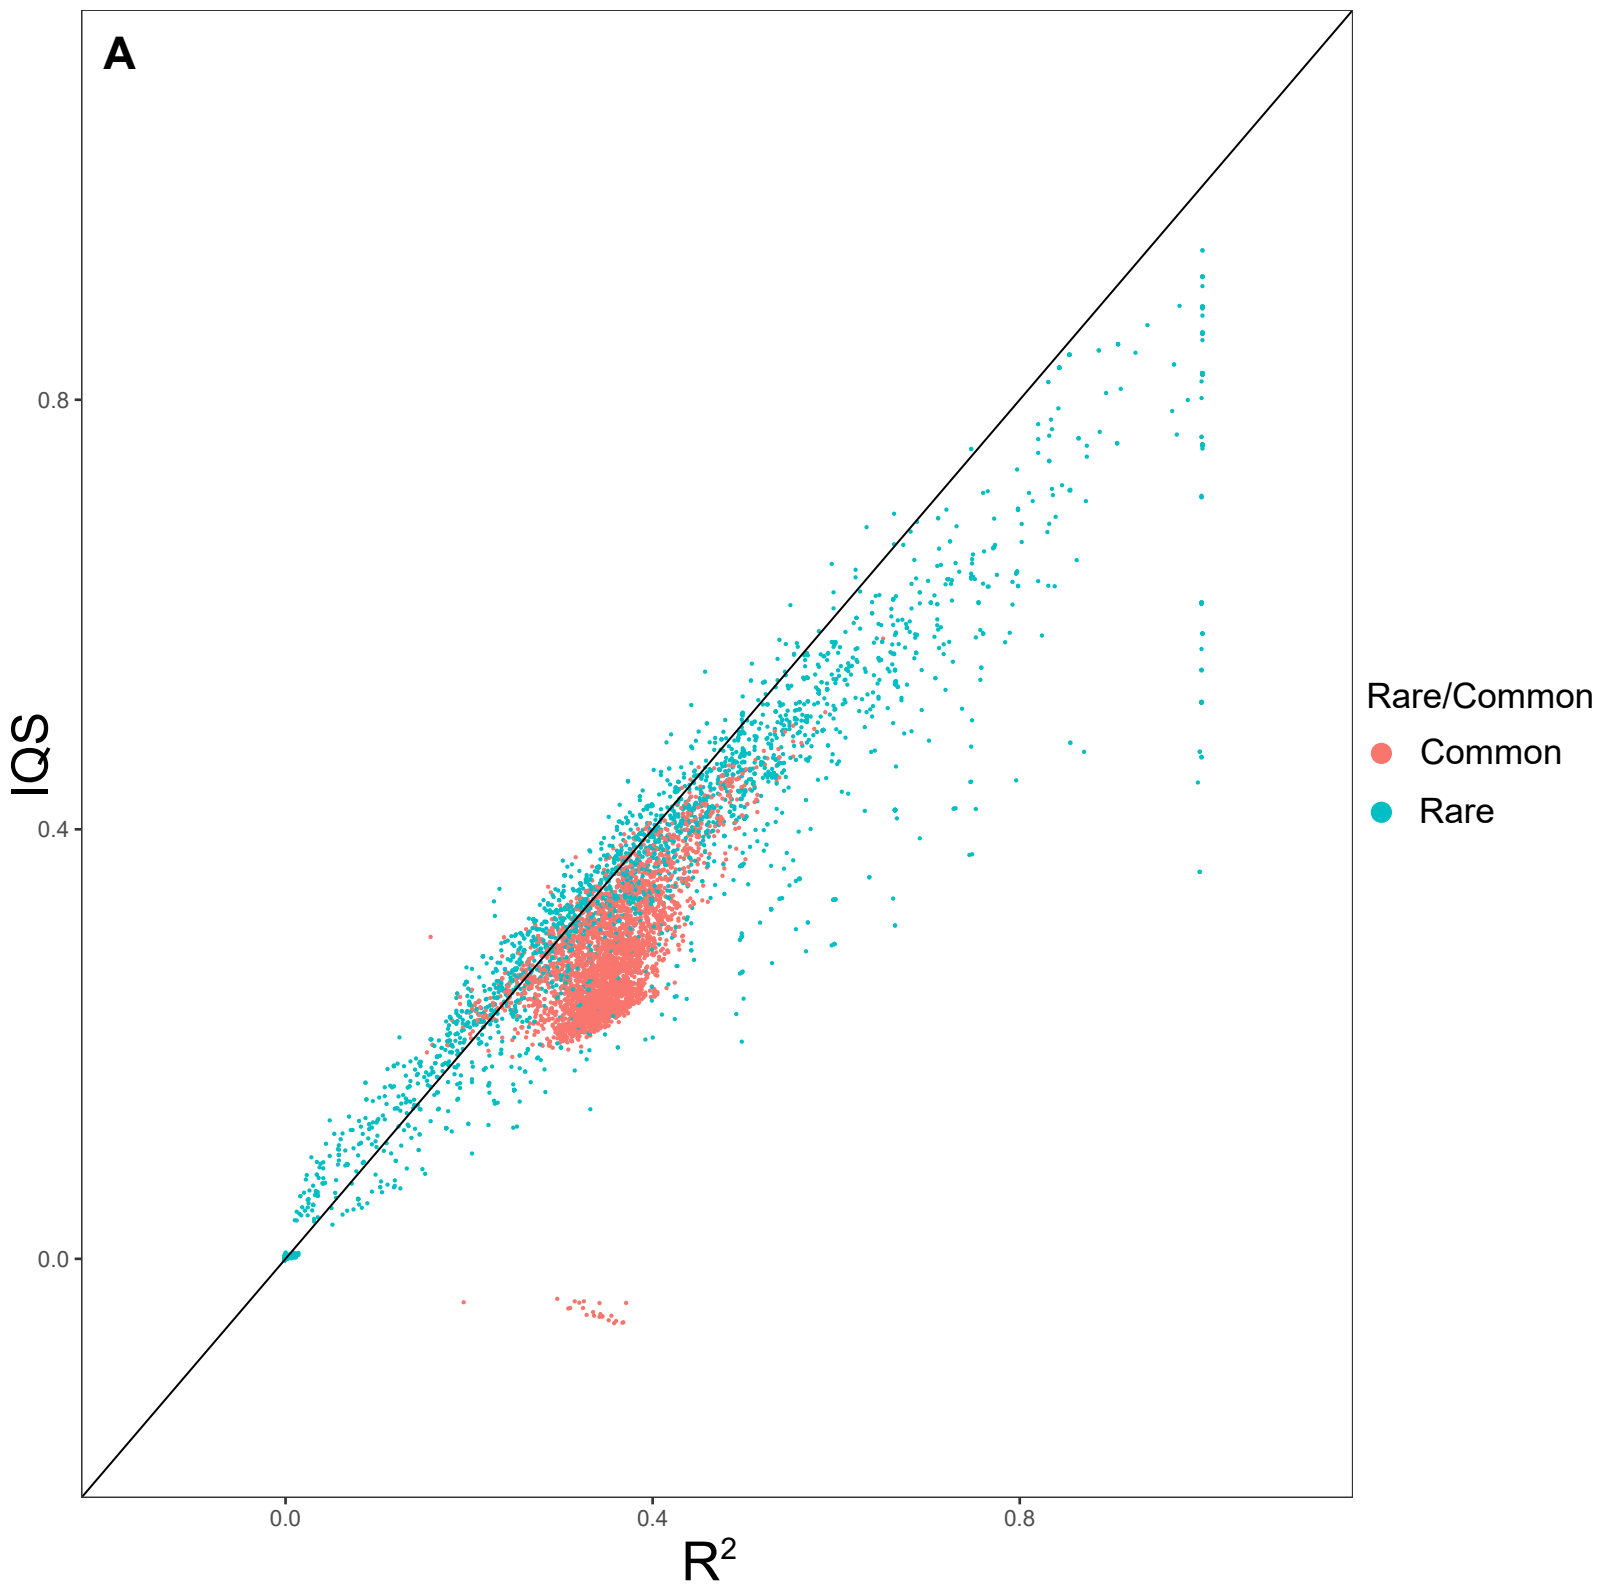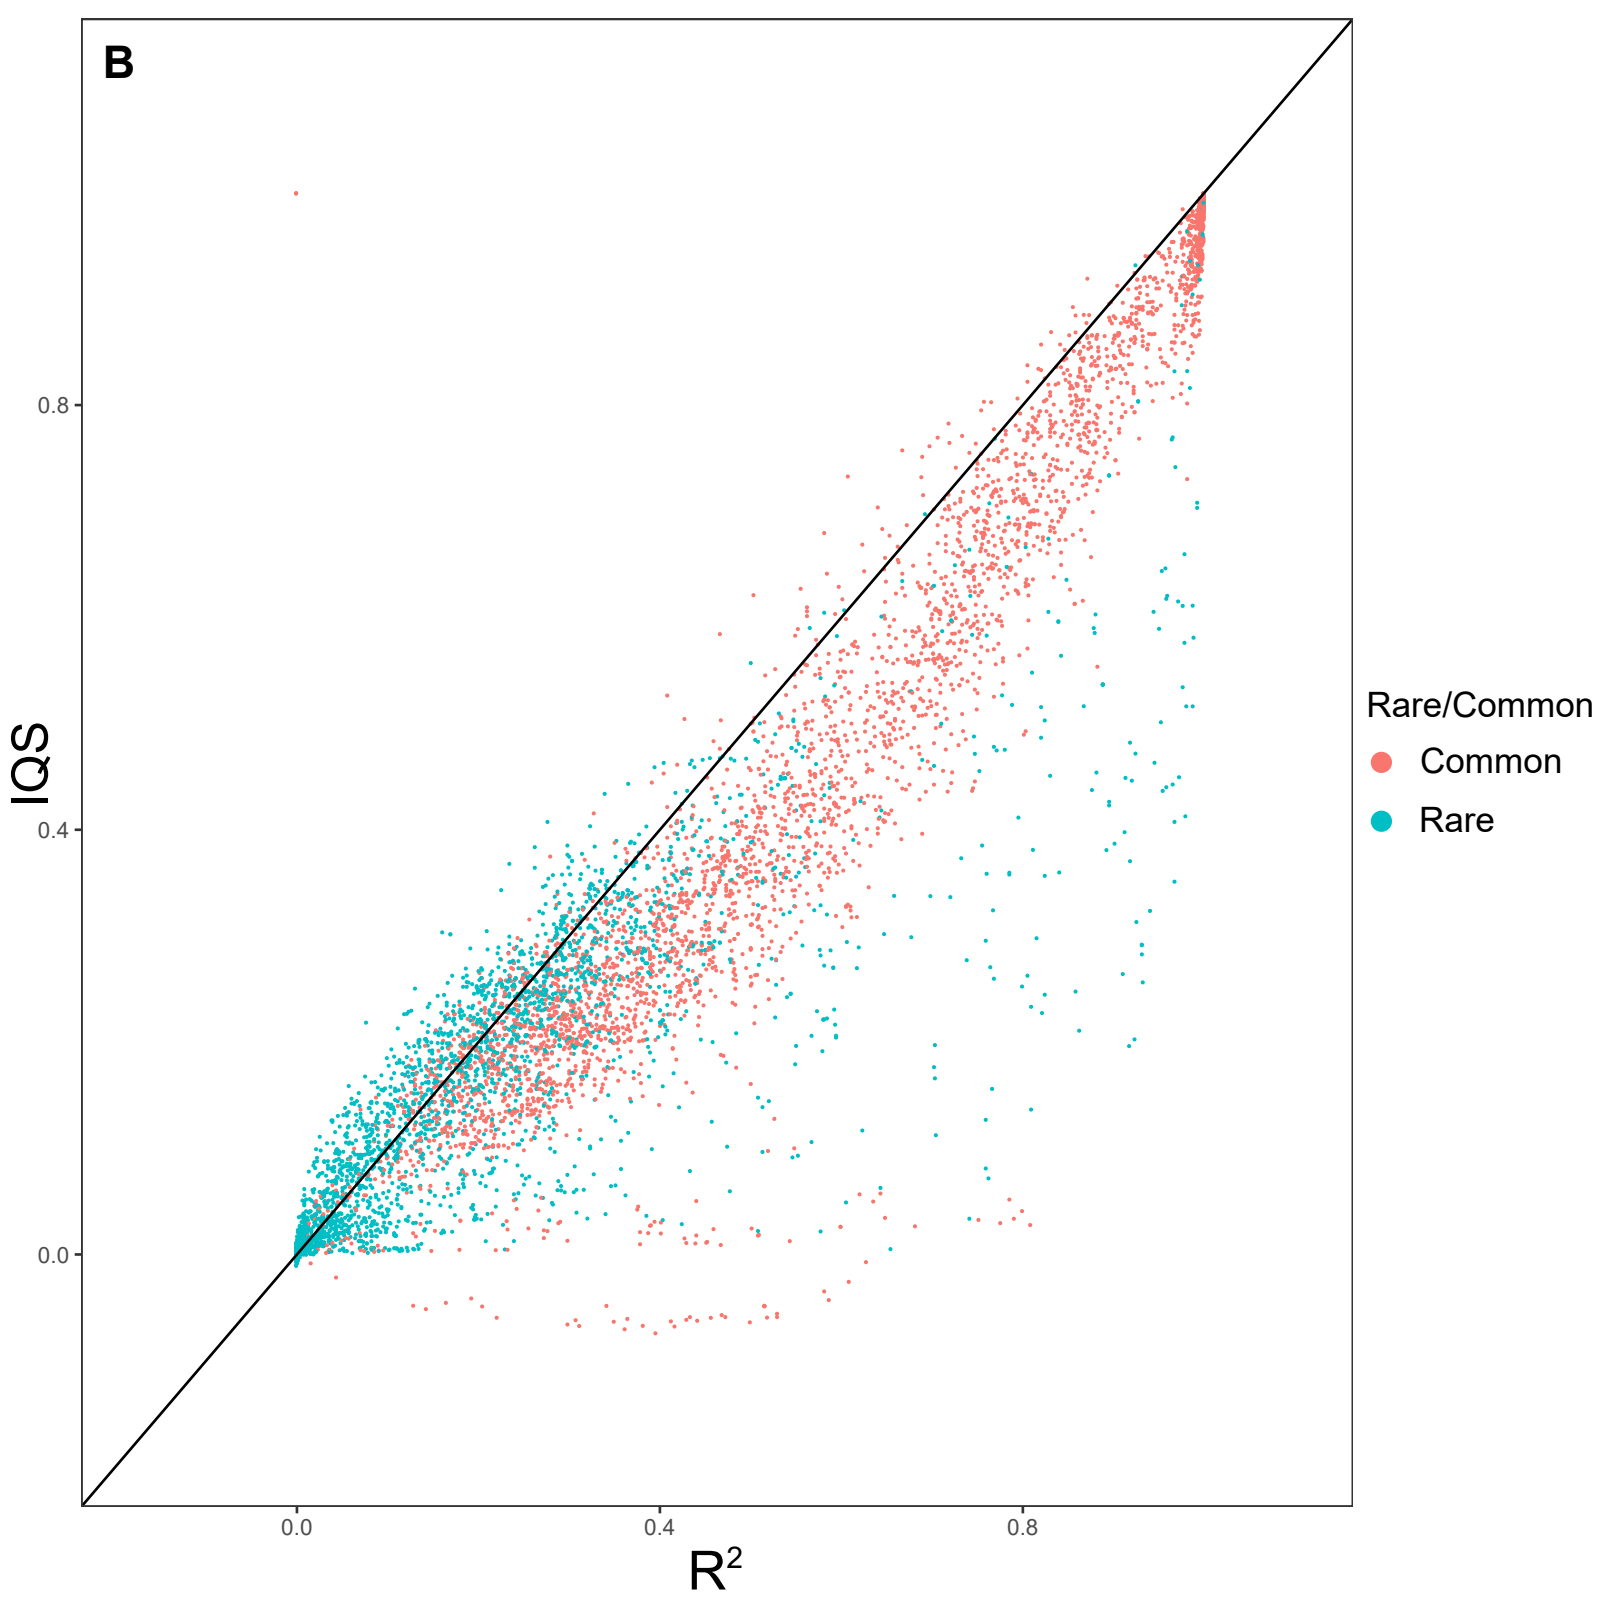

**Supplemental Figure S5:** Mean correlation  $R^2$  vs IQS for (A) GIGI and (B) duoHMM+minimac, in EUR, using the Random selection strategy.
