# Supplementary material for: Comparison and assessment of family- and population-based genotype imputation methods in large pedigrees
Source: HighWire-hosted journal article supplement (doi:10.1101/gr.236315.118), 2018-12-04
Supplement: Supplemental_Fig_S6.pdf [file Supplemental_Fig_S6.pdf]

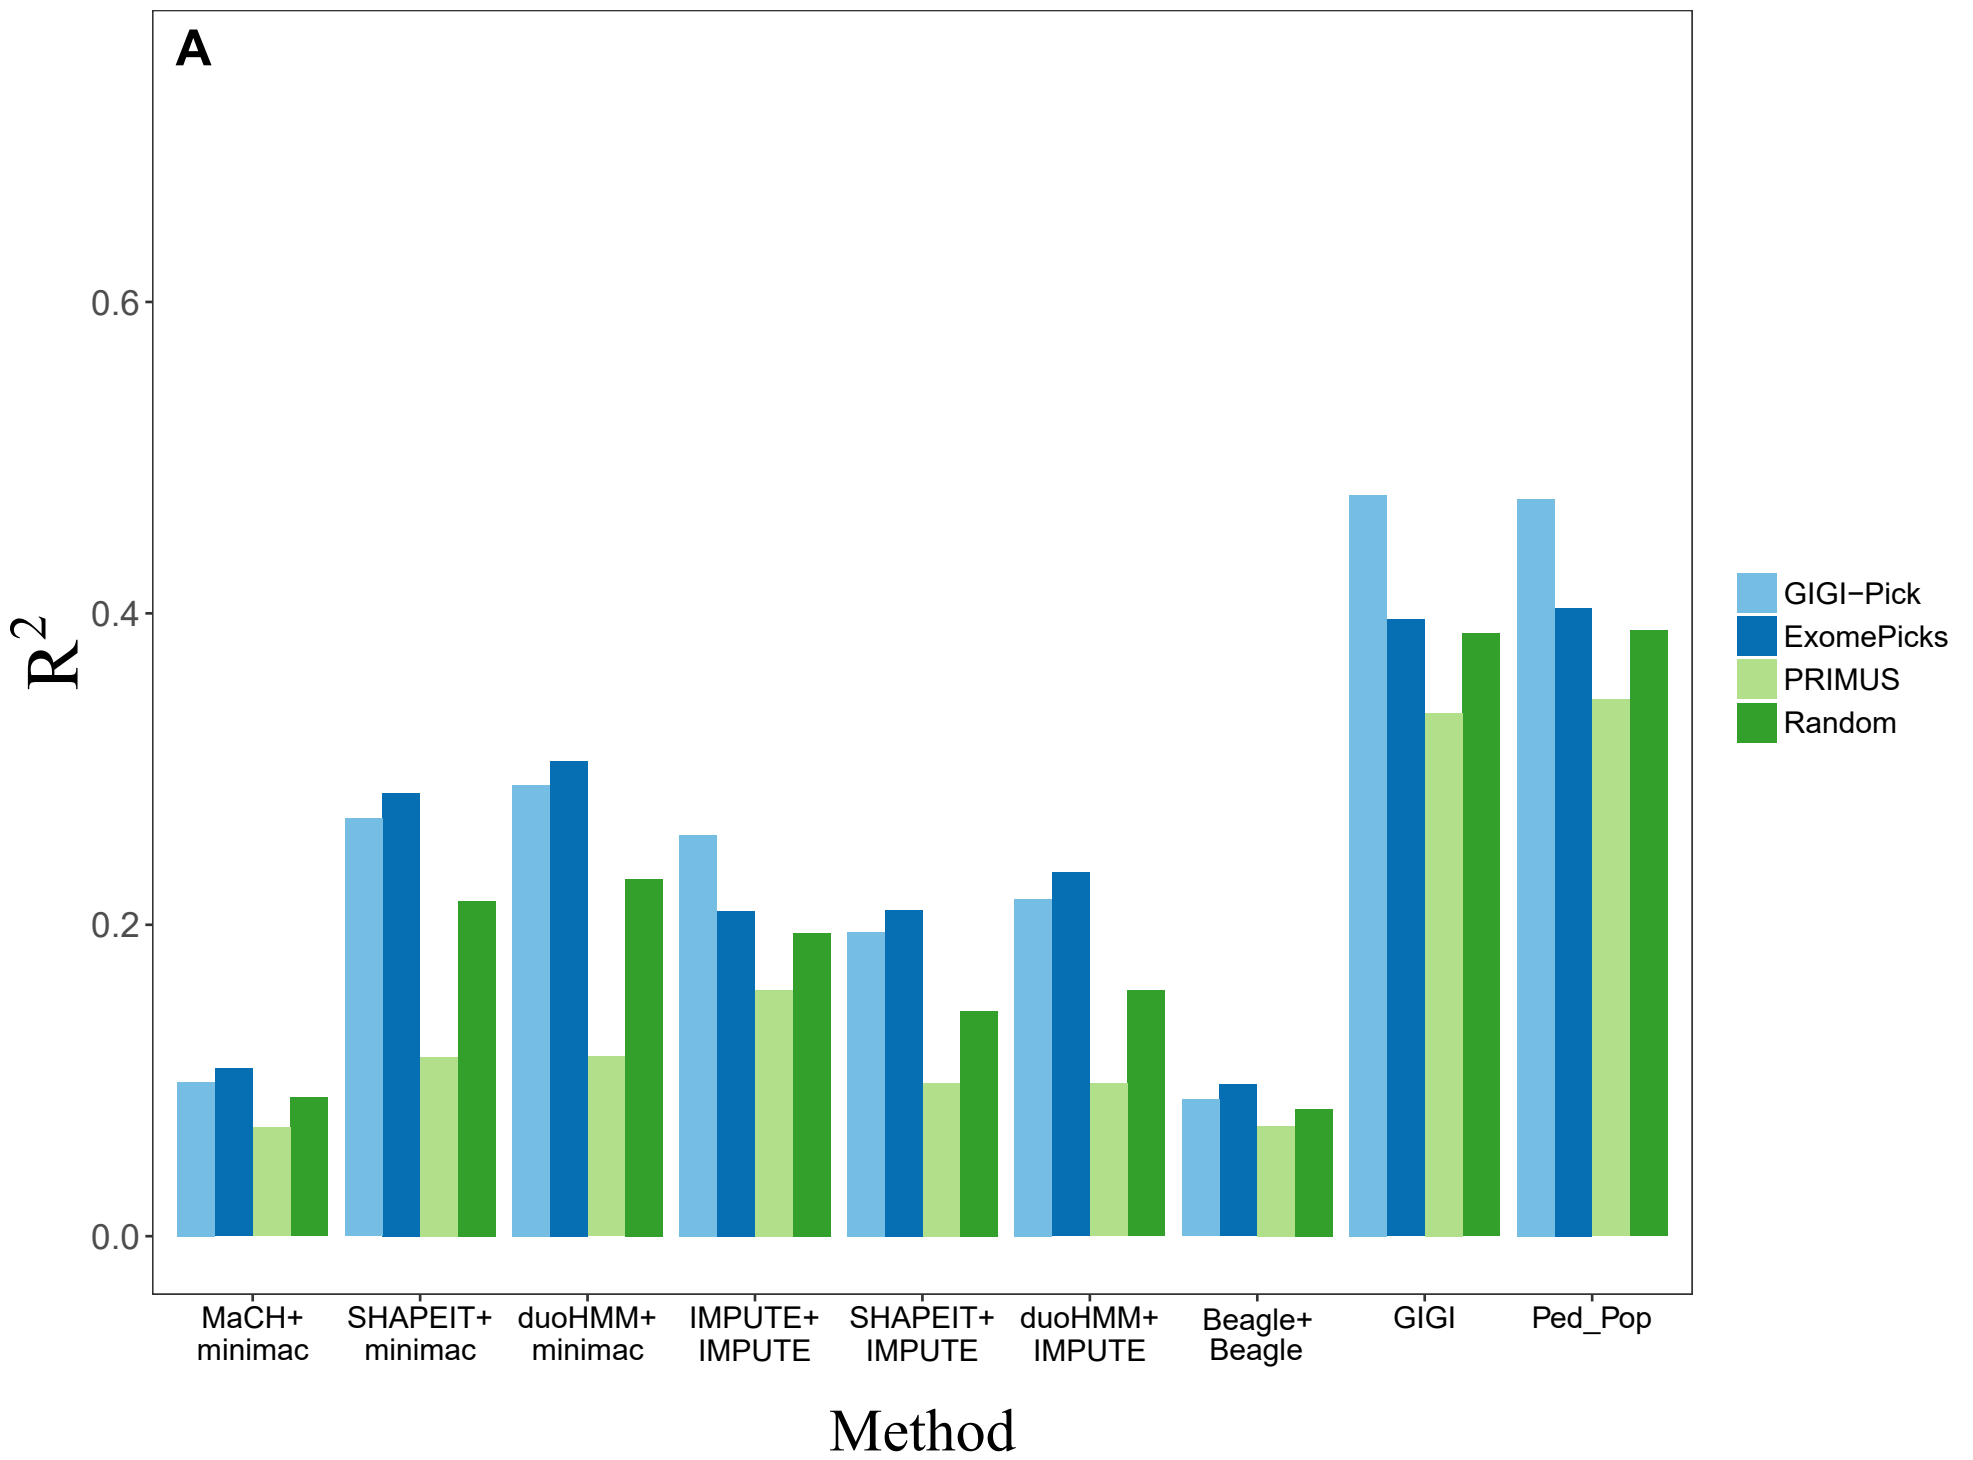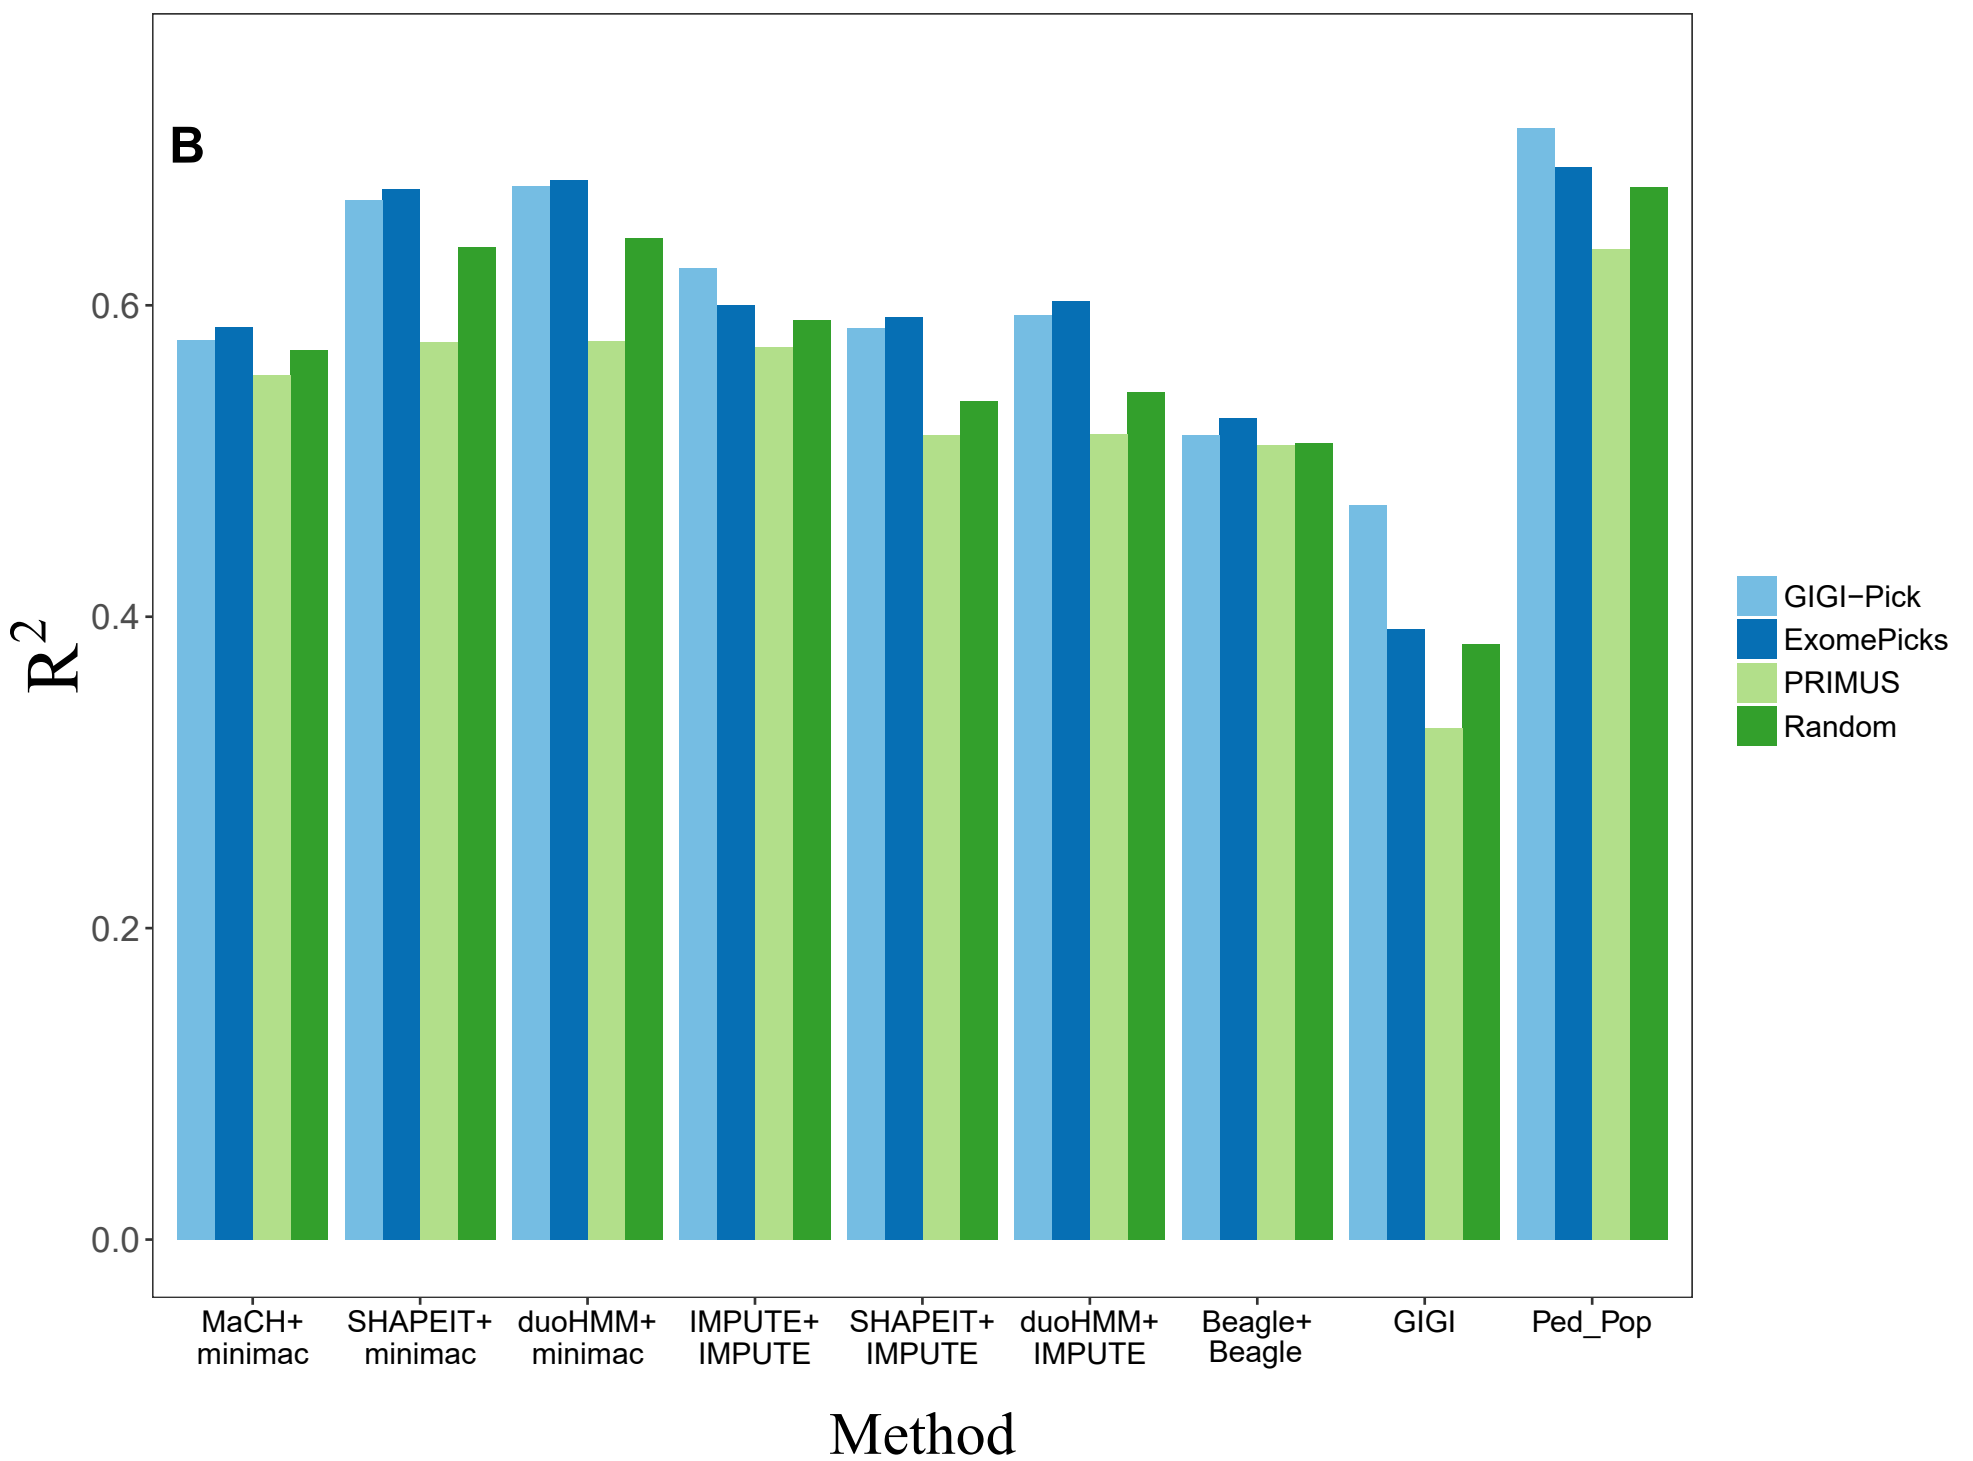

**Supplemental Figure S6:** Mean  $R^2$  between true and imputed genotypes for the four selection strategies (GIGI-Pick, ExomePicks, PRIMUS, and Random selection) for all approaches in EUR for (A) rare variants (MAF in [0.00-0.05]) and (B) common variants (MAF in [0.05-0.5]).
