# Supplementary material for: Comparison and assessment of family- and population-based genotype imputation methods in large pedigrees
Source: HighWire-hosted journal article supplement (doi:10.1101/gr.236315.118), 2018-12-04
Supplement: Supplemental_Fig_S7.pdf [file Supplemental_Fig_S7.pdf]

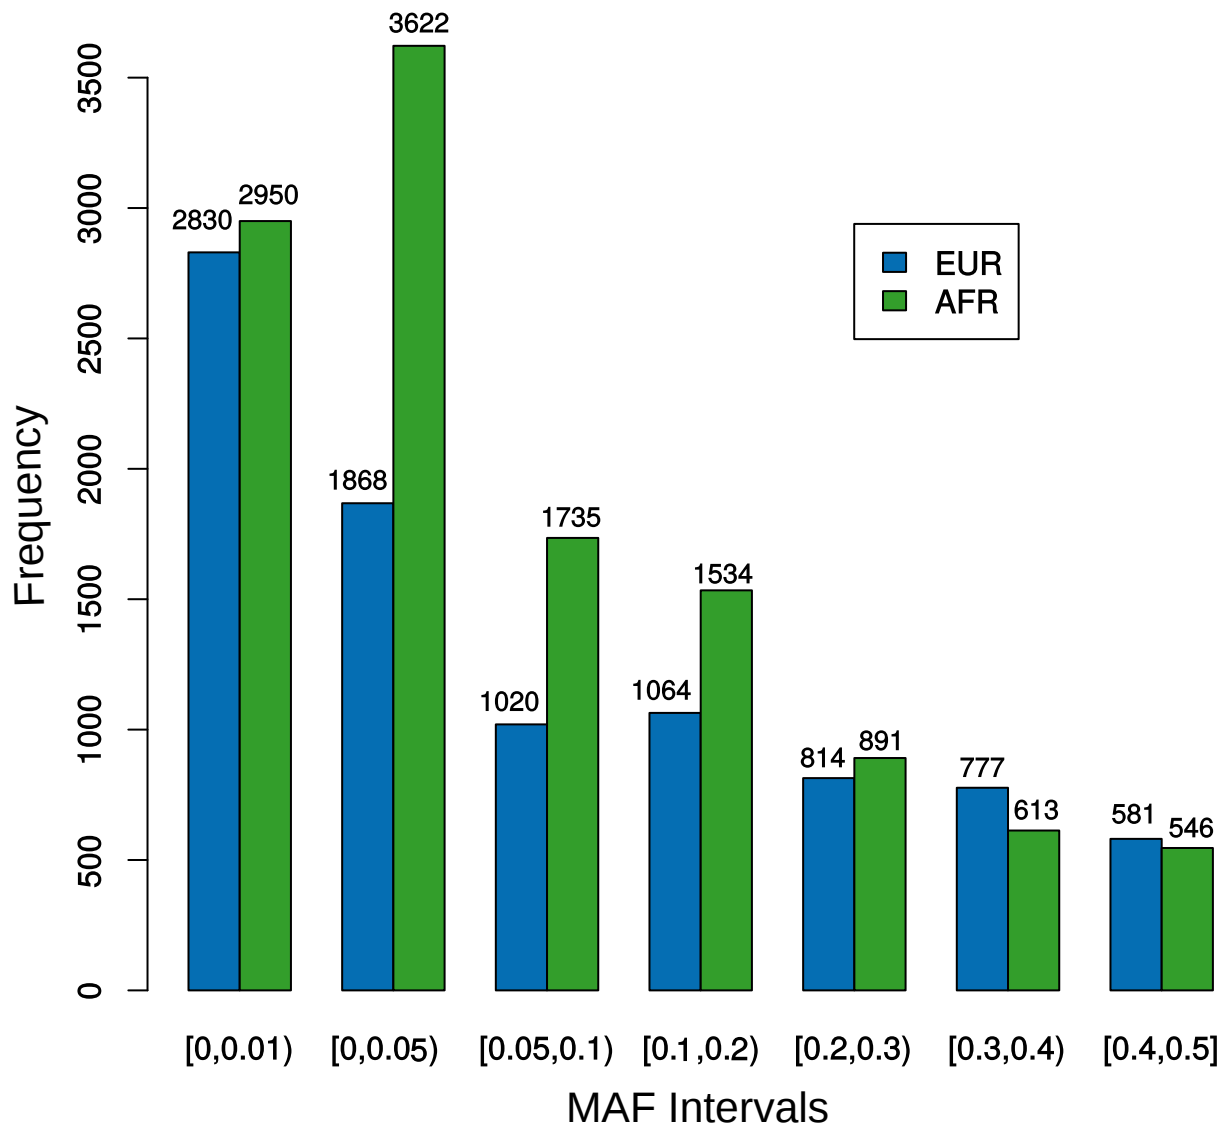

**Supplemental Figure S7:** MAF distribution for European and African populations in the simulated data.
